# Supplementary material for: Renaming ‘Chemosensory’ Proteins (CSPs): ‘Lipoid-Binding Proteins’ — Molecular Nomenclature, Structure, Expression, Evolution, and Intracellular Functions
Source: Preprints.org preprint supplement (doi:10.20944/preprints202403.0173.v1), 2024-03-04
Supplement: Supplementary file 1 [file Liuetal.IJMSFEb2024-TableS1.doc]

| Organism | **Order** | **Genome Assembly** | **Transcript Annotation** | **Length (bps)** | **N-terminus** | **C-terminus** | **Identity**  **% (Order subject)** |
| --- | --- | --- | --- | --- | --- | --- | --- |
|  |  |  |  |  |  |  |  |
| Acypi | Hemiptera | EQ110797 | Acypi000094 | 1236 | TSSYPTRY | KLTNNTTK | 92 (Hemiptera) |
|  |  | EQ110797 | Acypi009116 | 363 | PAKYTTKY | AKKLNIDV | 90 (Hemiptera) |
|  |  | EQ116326 | Acypi002311 | 1039 | LKKFLSTL | FLENLNTD | 78 (Hemiptera) |
|  |  | EQ117790 | Acypi000097 | 815 | GTAYTTKY | KKKGVVKF | 97 (Hemiptera) |
|  |  | EQ121783 | Acypi000093 | 812 | FPAYMKRF | KLNKFLDA | 90 (Hemiptera) |
|  |  | EQ121783 | Acypi000345 | 1554 | SGYYLSTY | IINFMNQK | 80 (Hemiptera) |
|  |  | EQ122410 | Acypi005842 | 844 | KDSSLPNV | LKQYQSGF | 96 (Hemiptera) |
|  |  | EQ125317 | Acypi000096 | 669 | FTLAEEKY | ERAAAAKH | 95 (Hemiptera) |
|  |  | EQ125317 | Acypi003368 | 2009 | EDDDKPDF | TANIVKIQ | 79 (Hemiptera) |
|  |  | EQ126525 | Acypi000095 | 645 | QEKYSTKY | KKLEKFSA | 91 (Hemiptera) |
|  |  |  |  |  |  |  |  |
| Bommo | Lepidoptera | BABH01034642 | Bommo-CSP5 | 123 | AGSYSDRY | -------- | 100 Allergen Tha p 1* |
|  |  | BABH01005933 | Bommo-CSP19 | 351 | AQQNRPQV | AKLRQYAG | 88 (Lepidoptera) |
|  |  | BABH01021421 | Bommo-CSP4 | 624 | TSTYYTTQ | TSNVDESK | 56 (Lepidoptera) |
|  |  | BABH01021423 | Bommo-CSP9 | 375 | PEQYTDKY | TELKRVTA | 100 (Rhizobiales) |
|  |  | BABH01021424 | Bommo-CSP6 | 393 | AEKYTDKY | EGFLAGQN | 100 (Enterobacterales) |
|  |  | BABH01021424 | Bommo-CSP7 | 366 | IARPKTPF | YEAKMESN | 50 (Lepidoptera) |
|  |  | BABH01021424 | Bommo-CSP8 | 384 | DDKYTDRY | ELDREIKA | 99 (Propionibacteriales) |
|  |  | BABH01021426 | Bommo-CSP14 | 360 | ESTYTDKW | IDAVKGSA | 96 Allergen Tha p 1* |
|  |  | BABH01021426 | Bommo-CSP15 | 366 | AEFYSSRY | DKFINEDD | 74 (Bacillales) |
|  |  | BABH01021427 | Bommo-CSP2 | 360 | QDKYEPID | SFKDFLES | 100 (Pseudonocardiales) |
|  |  | BABH01021429 | Bommo-CSP17 | 372 | RQQSYPRN | YTFLATGL | 84 Allergen Tha p 1* |
|  |  | BABH01021430 | Bommo-CSP3 | 754 | LAADLSKY | ADKFLLGS | 72 (Lepidoptera) |
|  |  | BABH01021430 | Bommo-CSP18 | 123 | -------- | AAFVVATD | 100 Allergen Tha p 1* |
|  |  | BABH01021431 | Bommo-CSP20 | 402 | QKYYDSRY | FEKVITNA | 68 (Lepidoptera) |
|  |  | BABH01021433 | Bommo-CSP12 | 366 | KETYSSEN | LLSAVANS | 95 (Propionibacteriales) |
|  |  | BABH01021434 | Bommo-CSP11 | 372 | EEYYSSQY | TAFINAMD | 98 Allergen Tha p 1* |
|  |  | BABH01021467 | Bommo-CSP13 | 381 | DLFYDKKY | KFLETYGH | 61 (Lepidoptera) |
|  |  | BABH01021709 | Bommo-CSP10 | 1798 | MPKYDERY | TQMKLKVR | 69 PAN1-like** |
|  |  | BABH01018301 | Bommo-CSP16 | 189 | -------- | KELRTIKA | 98 Allergen Tha p 1* |
|  |  |  |  |  |  |  |  |
| Pedhu | Phthiraptera | AAZ001007241 | Pedhu594410 | 429 | GEKYTTRW | NDNKENSR | 68 (Diptera) |
|  |  | AAZ001007241 | Pedhu594420 | 399 | PTKFTTKF | AAQKGITV | 55 (Diptera) |
|  |  | AAZ001007241 | Pedhu594430 | 451 | DEKYSTKY | AQKRKIQL | 58 (Diptera) |
|  |  | AAZ001007242 | Pedhu594540 | 423 | PTKFTTKF | DFAAKIKV | 54 (Diptera) |
|  |  | AAZ001007243 | Pedhu594550 | 384 | ISSYSTRY | DPNFLGKI | 44 (Hymenoptera) |
|  |  | AAZ001007243 | Pedhu594660 | 348 | PQKYSTKY | KFMEEPIE | 46 (Coleoptera) |

Table S1. Aphid ‘CSP’ gene repertoire in comparison to that of moths and lice, genome assembly, and protein identity. Acypi: *Acyrthosiphon pisum*, pea aphid (Hemiptera, Aphididae); Bommo: *Bombyx mori*, domestic mulberry silkworm moth (Glossata, Bombycidae); Pedhu: *Pediculus humanus humanus*, human body louse (Anoplura, Pediculidae). * Defense-related, ** Connected to development and molting. Gene truncations in Bommo are indicated by the dashed lines.
