# Supplementary material for: Renaming ‘Chemosensory’ Proteins (CSPs): ‘Lipoid-Binding Proteins’ — Molecular Nomenclature, Structure, Expression, Evolution, and Intracellular Functions
Source: Preprints.org preprint supplement (doi:10.20944/preprints202403.0173.v1), 2024-03-04
Supplement: Supplementary file 2 [file Liuetal.IJMSFeb2024-TableS2f.doc]

| **Locus** | **mRNA bps** | **Access**  **Number (R)** | **Protein**  **aa (kDa)** | **Access**  **Number (P)** | **Species** | **Identity** | Tissue | Function |
| --- | --- | --- | --- | --- | --- | --- | --- | --- |
| LOC111036095 | 459 | XM_022317999 | 153 (17.2) | XP_022173691 | *Myzus*  *persicae* | Mp10  “CSP4” Ebsp-3 | Whole body  Asexual adult | Innate Immunity induction |
| BABH01021709 | 633 | NM_001043604 | 211 (24.6) | AK368835 | *Bombyx*  *mori* | Bommo-CSP10  “BmorCSP10” | Antennae Legs  Fat body Gut  Epidermisƒ | Immune responseƒ |
| LOC126581753 | 2492 | XM_050245629 | 351 (37.7) | XP_050101586 | *Anopheles*  *aquasalis* | Mucin-2  Variant X6 |  | Translation initiation factor |
| LOC109621340 | 2802 | XM_029870982 | 408 (43.4) | XP_029726842 | *Aedes albopictus* | SamkC  Variant X9 | All body  Pupae | Serine-Threonine protein kinase |
| LOC129745337 | 1986 | XM_055738352 | 364 (38.8) | XP_055594327 | *Uranotaenia lowii* | Mucin C.1  Variant X6 | Integument  Whole body | Translation initiation factor |
| LOC115260417 | 1257 | XM_029861367 | 418 (45.8) | XP_029717227 | *Aedes albopictus* | Mucin-2 | All body  Pupae | Translation initiation factor |
| LOC126581753 | 2693 | XM_050245628 | 418 (45.6) | XP_050101585 | *Anopheles*  *aquasalis* | Mucin-2  Variant X5 |  | WAS-WASL-interacting protein |
| LOC118459415 | 2720 | XM_035922756 | 418 (46.2) | XP_035778649 | *Anopheles albimanus* | Extensin-like  Variant X5 | Whole body  Pupae | Cell wall component  Defense |
| LOC118459415 | 2909 | XM_035922754 | 418 (52.7) | XP_035778647 | *Anopheles albimanus* | Extensin-like  Variant X7 | Whole body  Pupae | Leucine-rich repeat  Extensin-like |
| LOC129952650 | 2022 | XM_056065396 | 361 (39.4) | XP_055921371 | *Eupeodes corollae* | Rho GTPase-activating protein X3 |  | Rho GTPase-activator |
| LOC109621340 | 3093 | XM_029870976 | 505 (54.4) | XP_029726836 | *Aedes albopictus* | Mucin-2 Variant X3 | All body  Pupae | Nuclear pore protein complex |
| LOC126564444 | 1245 | XM_050221501 | 401 (44.3) | XP_050077458 | *Aedes maculipalpis* | Mucin-2  Variant X4 |  | Translation initiation factor |
| LOC118513797 | 2611 | XM_036059988 | 400 (43.9) | XP_035915881 | *Aedes stephensi* | Mucin-2  Variant X3 | Whole body | Translation initiation factor |
| LOC118459415 | 2461 | XM_035922752 | 547 (56.2) | XP_035778645 | *Aedes albimanus* | Mucin-5AC  Variant X2 | Whole body  Pupae | Extensin-like |
| LOC109621340 | 3084 | XM_029870977 | 502 (54.8) | XP_029726837 | *Aedes albopictus* | Mucin-2  Variant X4 | All body  Pupae | Nuclear pore protein complex |
| LOC129744111 | 2632 | XM_055736495 | 496 (50.1) | XP_055592470 | *Uranotaenia lowii* | Mucin-2  Variant X3 | Whole body | Nuclear pore protein complex |
| LOC109621340 | 3318 | XM_029870961 | 580 (62.3) | XP_029726821 | *Aedes albopictus* | Mucin-2  Variant X1 | All body  Pupae | Nuclear pore protein complex |
| LOC120904750 | 2951 | XM_040315040 | 493 (54.4) | XP_040170974 | *Aedes arabiensis* | Extensin-like Variant X5 |  | Extensin-like |
| LOC118459415 | 2921 | XM_035922753 | 493 (51.4) | XP_035778646 | *Aedes albimanus* | Mucin-2  Variant X3 | Whole body  Pupae | Extensin-like |
| LOC121596701 | 3034 | XM_041921881 | 452 (48.7) | XP_041777815 | *Anopheles merus* | Mucin-5AC  Variant X7 | Whole body | Protein transport protein Sec31-like |
| LOC121596701 | 3371 | XM_041921880 | 564 (59.6) | XP_041777814 | *Anopheles merus* | Mucin-2  Variant X2 | Whole body | Mucin5AC-like |
| LOC121596701 | 3377 | XM_041921874 | 566 (59.8) | XP_041777808 | *Anopheles merus* | Mucin-2  Variant X1 | Whole body | Mucin5AC-like |
| LOC121596701 | 3022 | XM_041921883 | 448 (47.8) | XP_041777817 | *Anopheles merus* | Mucin-2  Variant X5 | Whole body | Mucin5AC-like |
| LOC121596701 | 3028 | XM_041921882 | 450 (47.9) | XP_041777816 | *Anopheles merus* | Mucin-5AC  Variant X8 | Whole body | Mucin5AC-like |
| LOC120904750 | 3137 | XM_040315039 | 555 (60.8) | XP_040170973 | *Anopheles arabiensis* | Extensin-like  Variant X4 | Male | Extensin-like |
| LOC129745337 | 2346 | XM_055738346 | 483 (51.0) | XP_055594321 | *Uranotaenia lowii* | Mucin-C1  Variant X1 | Integument  Whole body | Mucin-C1-like |
| LOC131210824 | 2638 | XM_058204117 | 386 (42.7) | XP_058060100 | *Anopheles bellator* | Mucin-2  Variant X1 | Tegument  Whole body | Protein UL36 |
| LOC124638351 | 1860 | XM_047175293 | 292 (32.1) | XP_047031249 | *Helicoverpa zea* | PAN1-like | Whole body  Pupae | Actin cytoskeleton-regulatory complex |
| LOC128303246 | 2787 | XM_053040137 | 472 (51.2) | XP_052896097 | *Anopheles moucheti* | Mucin-2  Variant X1 |  | Mucin-like |
| LOC118513797 | 2824 | XM_036059983 | 470 (51.2) | XP_035915876 | *Anopheles stephensi* | Extensin-like  Variant X1 | Whole body | Leucine-rich repeat  Extensin-like |
| Scaffold00198 | 878 | JH668476 | 288 (32.1) | KAG6454812 | *Manduca sexta* | Hypothetical |  |  |
| LOC118513797 | 2774 | XM_036059986 | 454 (49.5) | XP_035915879 | *Anopheles stephensi* | Mucin-like  Variant X2 | Whole body | Mucin-2-like |
| LOC126374415 | 3912 | XM_050021059 | 298 (32.7) | XP_049877016 | *Pectinophora gossypiella* | YLP motif- protein 1 | Whole body  Larvae | Nuclear nucleoside kinase |
| LOC126564444 | 2774 | XM_050221498 | 554 (59.7) | XP_050077455 | *Anopheles macupalpis* | Mucin-2  Variant X1 |  | Mucin-2-like |
| LOC118459415 | 3326 | XM_035922748 | 628 (66.0) | XP_035778641 | *Anopheles albimanus* | Mucin-2  Variant X1 | Whole body  Pupae | Mucin-2-like |
| LOC126564444 | 1410 | XM_050221500 | 456 (50.0) | XP_050077457 | *Anopheles maculipalpis* | Mucin-like  Variant X2 |  | Mucin-2-like |
| Taxon93504 | 651 | LC027715 | 217 (24.0) | BAV56819 | *Ostrinia furnacalis* | “CSP15” | Antennae* |  |
| LOC128271871 | 1721 | XM_053009541 | 396 (43.6) | XP_052865501 | *Anopheles cruzii* | WAS/WASL |  | Actin skeleton-regulatory complex |
| LOC128677457 | 1206 | XM_053758324 | 301 (33.6) | XP_053614299 | *Plodia interpunctella* | Formin-1-like | Whole body  Larvae | Actin-microtubule association |
| LOC120904750 | 3488 | XM_040315029 | 672 (72.6) | XP_040170963 | *Anopheles arabiensis* | Extensin-like  Variant X1 |  | Extensin-like |
| LOC111349097 | 1268 | XM_022960083 | 287 (31.8) | XP_022815851 | *Spodoptera litura* | PAN-1 | Whole body | Actin skeleton-regulatory complex |
| LOC5573135 | 2771 | XM_021847563 | 482 (51.4) | XP_021703255 | *Aedes*  *aegypti* | DAN4  Variant X4 | Whole body  Pupae | Nuclear pore protein complex |
| LOC126581753 | 2885 | XM_050245624 | 482 (52.0) | XP_050101581 | *Anopheles aquasalis* | Mucin-2  Variant X1 |  | Mucin-like |
| LOC120904750 | 3470 | XM_040315038 | 666 (71.5) | XP_040170972 | *Anopheles arabiensis* | Extensin-like  Variant X9 |  | Leucine-rich protein  Extensin-like |
| LOC120904750 | 3476 | XM_040315037 | 668 (71.7) | XP_040170971 | *Anopheles arabiensis* | Mucin-2  Variant X2 | Male | Mucin-like |
| LOC5573135 | 3059 | XM_021847553 | 576 (71.5) | XP_021703245 | *Aedes*  *aegypti* | NPCP  Variant X1 | Whole body  Pupae | Nuclear pore protein complex |
| LOC120955660 | 3533 | XM_040376732 | 667 (71.4) | XP_040232666 | *Anopheles coluzzii* | Mucin-2  Variant X1 |  | Mucin-like |
| LOC106137243 | 1976 | XM_021847553 | 305 (34.0) | XP_013193496 | *Amyelois transitella* | WASP-2 | Larvae | Actin skeleton-regulatory complex |
| LOC6034358 | 2296 | XM_038253956 | 402 (43.3) | XP_038109884 | *Culex quinquefasciatus* | DAN4  Variant X4 | Whole body | Cell wall protein |
| LOC106102595 | 1190 | XM_013282121 | 294 (32.9) | XP_013137575 | *Papilio*  *polites* | GP Ib-like  -chain |  | Outer surface membrane protein |
| LOC120427056 | 2533 | XM_052707633 | 461 (49.5) | XP_052563593 | *Culex*  *pipiens pallens* | Mucin-2  Variant X5 | Whole body | Mucin-like |
| M_scaff_1411 | 820 | CAKXAJ010025123 | 269 (30.3) | CAH2235359 | *Pararge*  *aegeria aegeria* | Jg5928 |  | Major outer envelope protein |
| LOC108904830 | 1520 | XM_018707509 | 576 (32.8) | XP_018563025 | *Anoplophora glabripennis* | CWA-3  Variant X1 | Larvae | Cell wall integrity  Stress response |
| LOC125234523 | 2861 | XM_048140790 | 287 (32.0) | XP_047996747 | *Leguminivora glycinivorella* | RickA-like  Variant X2 | Whole body  Larvae | Arp2/3 complex-activating protein |
| LOC128271871 | 2177 | XM_053009537 | 548 (59.0) | XP_052865497 | *Anopheles*  *cruzii* | Mucin-2  Variant X1 | Tegument | Virus-tegument cross-linker |
| LOC6034358 | 2697 | XM_038253951 | 535 (58.9) | XP_038109879 | *Culex quinquefasciatus* | Mucin-2  Variant X1 | Whole body | Cell wall protein |
| LOC123011164 | 1400 | XM_044408485 | 239 (26.3) | XP_044264420 | *Tribolium maedens* | Allergen Tha p1  Variant X2 | Whole body | IgE binding protein |
| LOC116772069 | 1195 | XM_032664103 | 297 (32.9) | XP_032519994 | *Danaus*  *plexipus plexipus* | WAS/WASL |  | Actin skeleton-regulatory complex |
| LOC129727069 | 2801 | XM_055684473 | 625 (66.2) | XP_055540448 | *Wyeomyia smithii* | Mucin-2  Variant X1 | Whole body | Mucin-like |
| LOC129727069 | 2580 | XM_055684478 | 553 (58.5) | XP_055540453 | *Wyeomyia smithii* | Mucin-2  Variant X3 | Whole body | Mucin-like |
| LOC122855961 | 1243 | XM_044157672 | 128 (14.5) | XP_044013607 | *Aphidius gifuensis* | Allergen Tha p1 | Adults | IgE binding protein |
| LOC129727069 | 2476 | XM_055684480 | 518 (54.9) | XP_055540455 | *Wyeomyia smithii* | Mucin-2  Variant X5 | Whole body | Mucin-like |
| Scaffold_15245 | 372 | CH916367 | 122 (14.0) | GH22042 | *Drosophila grimshawi* | Pherokine-3-PC | Embryo  Pupae | Immunity |
| LOC6532152 | 607 | XM_002092892 | 239 (13.6) | XP_002092928 | *Drosophila yakuba* | Ebsp-3/PebIII | Ejaculatory bulb/duct | Sperm storage |
| LOC122859060 | 559 | XM_044162408 | 128 (14.2) | XP_044018343 | *Aphidius gifuensus* | Allergen Tha p1 | Adults | IgE binding protein |
| LOC125060609 | 487 | XM_047665563 | 121 (14.2) | XP_047521519 | *Pieris*  *napi* | Allergen Tha p1 |  | IgE binding protein |
| LOC123307467 | 1891 | XM_044889794 | 457 (50.7) | XP_044745729 | *Coccinella septempunctata* | Eukaryotic TIF  Variant 4  |  | Translation initiation factor |
| Taxon80765 | 387 | KJ451426 | 128 (14.4) | AHX71992 | *Aphis*  *gossypii* | Acid trehalase  “CSP3” | Fat body | Trehalose metabolism |
| LOC123712760 | 465 | XM_045666008 | 239 (26.3) | XP_045521964 | *Pieris*  *brassicae* | Allergen Tha p1 |  | IgE binding protein |
| Scaffold00027 | 846 | JANFCV010000027 | 282 (31.4) | KAI5642933 | *Phthorimaea operculella* | A10/OS-D domain | Adults |  |
| Scaffold133 | 393 | JAANIC010002949 | 131 (14.7) | KAG5343447 | *Acromyrmex charruanus* | PEB3 | Whole body |  |
| LOC124166051 | 721 | XM_046543645 | 131 (14.5) | XP_046399601 | *Ischnura*  *elegans* | Allergen Tha p1  Variant X2 |  | IgE binding protein |
| PHUM594540 | 423 | XM_002432550 | 140 (15.5) | XP_002432595 | *Pediculus hum. corporis* | Ebsp-3/PebIII | Larvae |  |
| LOC123010695 | 476 | XM_044407769 | 124 (14.4) | XP_044263704 | *Tribolium maedens* | Allergen Tha p1 | Whole body  Pupae | IgE binding protein |
| Chromosome 2R | 339 | CP012524 | 113 (13.1) | ALC42649 | *Drosophila busckii* | PebIII | Whole body  Larva |  |
| Dmel_CG9358 | 363 | NM_001299941 | 121 (13.4) | NP_001286870 | *Drosophila melanogaster* | Pherokine-3  Variant B | Embryonic  gonads | Immunity |
| Scaffold_15245 | 366 | CH916367 | 122 (13.8) | EDW02527 | *Drosophila grimshawi* | GH22042/OS-D |  |  |
| LOC107225040 | 553 | XM_015665345 | 127 (14.1) | XP_015520831 | *Neodiprion lecontei* | Allergen Tha p1  Variant X1 | Thorax  Abdomen | IgE binding protein |
| LOC124186858 | 574 | XM_046578909 | 127 (14.2) | XP_046434865 | *Neodiprion fabricii* | Allergen Tha p1 | Thorax  Abdomen | IgE binding protein |
| LOC124166051 | 708 | XM_046543644 | 131 (14.2) | XP_046399600 | *Ischnura*  *elegans* | Allergen Tha p1  Variant X1 |  | IgE binding protein |
| LOC124223445 | 658 | XM_046635425 | 127 (14.2) | XP_046491381 | *Neodiprion pinetum* | Allergen Tha p1  Variant X2 | Thorax  Abdomen | IgE binding protein |
| LOC124308780 | 659 | XM_046771826 | 127 (14.2) | XP_046627782 | *Neodiprion virginianus* | Allergen Tha p1  Variant X2 | Thorax  Abdomen | IgE binding protein |
| LOC110991536 | 755 | XM_022256909 | 121 (14.2) | XP_022112601 | *Pieris*  *rapae* | Allergen Tha p1 |  | IgE binding protein |
| Contig_79 | 360 | LYFD01000069 | 120 (13.8) | OIB81003 | *Acinetobacter*  *baumannii* | A10/OS-D | Prokaryotic cell |  |
| Contig_92 | 261 | LYGG01000091 | 87 (9.8) | OIC85870 | *Acinetobacter*  *baumannii* | A10/OS-D | Prokaryotic cell |  |

**Table S2.** Sequences producing significant alignments with Mp10 protein (query length 153 amino acids; e-value 2e-107 to 3e-31).

From highest identity % protein to query to lowest identity percentage protein, the sequences are listed (NCBI BLAST, blastp, nr database, 24th August 2023). OIB81003 and OIC85870 are from microbial protein blast [34]. * The asterisk denotes that an antennal clone was used to obtain the sequence. There was no tissue-distribution research done.ƒ Results of the real-time PCR tissue distribution analysis test [25]. Lack of information leaves a void under Tissue and Function.
