# Supplementary material for: Renaming ‘Chemosensory’ Proteins (CSPs): ‘Lipoid-Binding Proteins’ — Molecular Nomenclature, Structure, Expression, Evolution, and Intracellular Functions
Source: Preprints.org preprint supplement (doi:10.20944/preprints202403.0173.v1), 2024-03-04
Supplement: Supplementary file 3 [file Liuetal.IJMSFeb2024-TableS3f.docx]

| **Name** | **Nb**  **aa** | **MW**  **(kDa)** | **Access**  **Number (P)** | **Organism**  **Species** | **Identity** | **Tissue Chr**  **Gene locus** | **Function** |
| --- | --- | --- | --- | --- | --- | --- | --- |
| AaegCWPDAN4X4 | 482 | 51.4 | XP_021703255 | *Aedes aegypti* | DAN4  isoform X4 | Whole pupae,  tegument  Chr2 | Cell wall protein |
| AaquTIF2 | 351 | 37.7 | XP_050101586 | *An.*  *aquasalis* | Translation initiation factor IF-2-like isoform X3 | Chr2 | “OS-D-like”  Translation initiator |
| AaquWAS/WASL | 418 | 45.4 | XP_050101585 | *Anopheles*  *aquasalis* | WAS/WASL-  interacting protein family member 1-like isoform X2 | Chr2  LOC126581753 | “OS-D-like”  Mucin-2 |
| AEalbSamkC | 408 | 44.3 | XP_029726842 | *Ae. albopictus* | SamkC  isoform X9 | All body  Chr2 | Ser/Thr-protein kinase |
| AglaCWPX3 | 243 | 26.7 | XP_018563027 | *Anoplophora glabripennis* | CWP3-like isoform X3 | Larvae  LOC108904830 | “OS-D”  Integrity of  cell wall  Stress response |
| ANalbLRRX4 | 489 | 52.6 | XP_035778647 | *Anopheles albimanus* | LRR-like protein 5 isoform X4 | Adult female,  whole body  Chr2 | “OS-D”  Leucine-rich repeat extensin |
| AcruMucin2 | 548 | 58.6 | XP_052865497 | *An. cruzii* | Mucin2-like  isoform 1 | Tegument  Chr3 | Mucin |
| AcruWAS/WASL | 396 | 43.6 | XP_052865501 | *An. cruzii* | WAS/WASL  isoform X4  UL36 | Tegument  Chr3 | WAS/WASL-  interacting protein |
| AmerMucin2 | 448 | 47.8 | XP_041777817 | *An. merus* | Mucin-2-like isoform X5 | Adults,  whole body  Chr3R | Mucin |
| AmerMucin5AC | 452 | 48.7 | XP_041777815 | *An. merus* | Sec-31-like isoform X3 | Adults,  whole body | Protein transport protein |
| AMS2711750 | 96 | 9.6 | KPK83846 | *Bacteroides* sp. SM23_62_1  Bacteria  Bacteroidia  Bacteroidales | Hypothetical protein  AMS27_11750 | Sediment metagenome | Hypothetical |
| AplanCSP | 325 | 37.3 | CAB3231652 | *Arctia plantaginis* | Unnamed | LOCUS4521 | “OS-D”-like |
|  |  |  |  |  |  |  |  |
| CAUAvd | 136 | 16.1 | DAK32723 | *Heunggongvirae*  Caudoviricetes,  Viruses | *ctUaT18  Avd-like | Human metagenome | DGR-protein |
| CparMraZ | 164 | 18.7 | HHE32374 | *Chlorobaculum parvum*  Bacteria  Chlorobiia  Chlorobiales | MraZ | Hydrothermal vent metagenome | Transcriptional regulator |
| CsecThap1 | 126 | 14.4 | XP_023715540 | *Cryptotermes secundus* | Tha p 1 | Workers,  whole body | Allergen |
| CUPHUDBP | 152 | 15.8 | WP_035823962 | *Cupriavidus sp.* SK-4  Bacteria -Proteobacteria; Burkholderiales | DNA-binding protein  HU family |  | Histone-like  DBP  Chromosome  condensation |
| EbalCSP3 | 213 | 24.2 | QIS77190 | *Episyrphus balteatus* | “CSP” |  | “OS-D”-like |
| EbalCSP4 | 321 | 35.3 | QIS77191 | *E. balteatus* | “CSP” |  | “OS-D”-like |
| EbalDDBG0285119X1 | 371 | 41.1 | XP_055839111 | *E. balteatus* | DDB_  G0285119 isoform X1 | Chr1 | “OS-D-like” |
| EcorRho | 361 | 39.4 | XP_055921371 | *Eupeodes corollae* | Rho17  isoform X3 | Chr3 | Rho GTPase-  activator |
| HhatDBPXRE | 154 | 18.0 | EFC99453 | *Hungatella hathewayi*  DSM 13479  Bacteria,  Clostridia, Eubacteriales | DNA-binding helix-turn-helix protein | Cytoplasm,  CLOSTHATH_02328 | Transcriptional regulator  XRE-family |
| IpodCSP | 263 | 30.7 | CAH2042437 | *Iphiclides*  *podalirius* | Unnamed | Chr14  IPOD504_  LOCUS3820 | “OS-D”-like |
| LborTetR/AcrR | 170 | 19.2 | WP_011671486  WP_061220709 | *Leptospira borgpetersenii*  Bacteria Spirochaetia Leptospirales | TetR/AcrR |  | Transcriptional regulator  Regulation of  DNA-templated transcription |
| LlonGTA1 | 475 | 52.6 | WP_058530090 | *Legionella londiniensis*  Bacteria g-Proteobacteria  Legionellales | Mannose-1-P- guanylyl  transferase/  mannose-6-  phosphate isomerase |  | Mannose  Glycosyl  transferase family A |
| LlonGTA2 | 486 | 54.0 | KTD19891 | *L. londiniensis*  Bacteria g-Proteobacteria  Legionellales | Phospho  mannose isomerase GDP mannose pyro-  phosphorylase | Llon_ctg033 | P-mannose  Glycosyl  transferase family A |
| OvarDBPXRE | 143 | 16.3 | BAL01528 | *Oscillibacter valericigenes*  Sjm18-20,  Bacteria,  Clostridia, Eubacteriales | DNA-binding protein | OBV_43290 | Transcriptional regulator  XRE-family  Nucleotide  binding |
| PaegJg6675 | 217 | 25.0 | CAH2266975 | *Pararge*  *aegeria aeg.* | Jg6675 | PAEG_Locus  25571 | “OS-D”-like |
| PlutMraZ | 153 | 17.3 | KZK74918  WP_303680859  WP_011358831 | *Pelodictyon luteolum* (*Chlorobium luteolum*)  Bacteria  Chlorobiia  Chlorobiales | Division/cell wall cluster transcriptional repressor MraZ | Lake water metagenome | Transcriptional regulator |
| PpyrMucin5AC | 338 | 37.7 | XP_031351203 | *Photinus*  *pyralis* | Mucin-5AC  -like | Adult male,  whole body  LOC116176644 | “OS-D-like”  Mucin |
| SFRURICE011779 | 265 | 30.8 | KAF9818733 | *Spodoptera frugiperda* | A10/OS-D | Adult males,  whole body | “OS-D-like” |
| SfulWP223199665 | 67 | 15.5 | WP_223199665 | *Solihabitans fulvus*  Bacteria, Actinomycetes, Pseudonocardiales | A10/OS-D |  | “OS-D-like” |
| TechAcrR | 193 | 20.7 | SEF50864 | *Thermonospora echinospora*  Bacteria, Actinomycetota, Actinomycetes, Streptosporangiales | **AcrR family DNA-binding protein | SAMN04489712_101243 | DNA-binding transcriptional regulator |
| RtorDBPXRE1 | 138 | 15.6 | WP_044998036 | *Ruminococcus torques*  Bacteria  Clostridia, Eubacteriales | Helix-turn-  helix Transcriptional regulator |  | Transcriptional regulator  XRE-family  Nucleotide  binding |
| RtorDBPXRE2 | 146 | 16.7 | EDK23754 | *Ruminococcus torques*  Bacteria,  Clostridia, Eubacteriales | DNA-binding helix-turn-helix protein | Contig63 | Transcriptional regulator  XRE-family  Nucleotide  binding |
| WP016226835 | 135 | 15.7 | EOS77856  WP_016226835 | *Lachnospiraceae bacterium*  10-1  Bacteria,  Clostridia, Eubacteriales | Hypothetical | C819_00471 | Hypothetical |
| WP020776583 | 163 | 18.9 | WP_020776583 | *Leptospira*  *meyeri*  Bacteria Spirochaetia Leptospirales | Hypothetical |  | Hypothetical |
| WP004787694 | 163 | 19.0 | WP_004787694 | *L.*  *meyeri*  Bacteria Spirochaetia Leptospirales | Hypothetical |  | Hypothetical |
| WsmiSamkC | 520 | 56.2 | XP_055540454 | *Wyeomyia smithii* | Serine/threonine-protein kinase SamkC  isoform X4 | Adult male,  whole body  Chr3  LOC129727069 | Ser/Thr kinase  SamkC |

**Table S3.** Sequences producing significant PAUP-Tree between “CSP”, CWP, LRR, Rho, SamkC, Sec31, TIF, WAS-WASL, and DBPs (transcriptional regulators of the XRE-family). *Viral Accessory variability determinant (Avd) proteins, such as ctUaT18, are a subset of Diversity Generating Retroelements (DGR) genetic cassettes that mutate target genes only in a specific way to produce hypervariable proteins.

**Bacterial AcrR is a single-component repressor of the antibiotic resistance and lipid transport genes.

Chr: Chromosome.
