# Supplementary material for: Renaming ‘Chemosensory’ Proteins (CSPs): ‘Lipoid-Binding Proteins’ — Molecular Nomenclature, Structure, Expression, Evolution, and Intracellular Functions
Source: Preprints.org preprint supplement (doi:10.20944/preprints202403.0173.v1), 2024-03-04
Supplement: Supplementary file 4 [file Liuetal.IJMSFeb2024-TableS4.doc]

| **Name** | **Nb**  **aa** | **MW**  **(kDa)** | **Access Number (P)** | **Organism**  **Species** | **Identity** | **Tissue Chr Gene locus** | **Function** |
| --- | --- | --- | --- | --- | --- | --- | --- |
| AalbRBPFOX1 | 671 | 67.0 | XP_062709901 | *Aedes*  *albopictus* | RNA-binding protein fox-1 homolog 1  isoform X8 | Adult male,  whole body  Chr2  LOC109419707 | Splicing regulation  (via GCAUG) |
| AdarRBP | 405 | 43.7 | ETN67466  XP_049529535 | *Anopheles darlingi* | RNA-binding protein  Cleavage stimulation factor | Chr2 | RNA recognition motif  Transcription termination |
| ARS-RBPYhbY | 97 | 10.8 | RXK34257  WP_032114384 | Arsenophonus Multispecies  Bacteria  -proteobacteria  Enterobacterales | RNA-binding protein YhbY | Cytoplasm  Endosymbiont  of. *B. tabaci*  Bacteriocyte | RNA binding Preribosome binding  Ribosome assembly* |
| AsinRBP | 64 | 7.2 | KFB40836 | An.sinensis | RNA-binding protein | ZHAS_  0008365 | RNA  binding |
| BmorRBP1 | 142 | 16.7 | XP_012547769 | Bombyxmori | RNA-binding protein-1  isoform X2 | Chr15  Gene Rbp1  733053 | RNA  binding |
| BtabRBP15 | 251 | 28.0 | UYF10700  XP_018914255 | Bemisiatabaci | RNA-binding protein 15 | Adult,  whole body | RNA motif- binding |
| MturRBP | 80 | 8.4 | WP_086153840 | *Mycobacterium*  *Tuberculosis*  Bacteria  Actinomycetes  Mycobacteriales | RNA-binding protein |  | Nucleotide binding |
| NOC-RBP | 80 | 8.3 | MBO08556625  WP_040708791  WP_067514134 | *Nocardia* Multispecies  Bacteria  Actinomycetes  Mycobacteriales | RNA-binding protein | Termitarium  metagenome | Nucleotide  binding |
| TcasRBPFOX1 | 178 | 18.8 | KYB27196  XP_008193531  XP_008193529 | *Tribolium castaneum* | RNA-binding protein fox-1 homolog 3-like | LOC655682 | RNA motif-  Nucleotide binding |

**Table S4.** Sequences of RNA-binding proteins (RBPs) used in PAUP-tree for molecular comparisons with “CSP”, CWP, Rho, SamkC, Sec31, TIF, WAS-WASL, and DBPs.

* Associated with the pre-50S ribosome subunit in ribosome assembly, required for optimal growth but not for cell viability.
