# Supplementary material for: Renaming ‘Chemosensory’ Proteins (CSPs): ‘Lipoid-Binding Proteins’ — Molecular Nomenclature, Structure, Expression, Evolution, and Intracellular Functions
Source: Preprints.org preprint supplement (doi:10.20944/preprints202403.0173.v1), 2024-03-04
Supplement: Supplementary file 4 [file supplementary]

1kx9.1.A

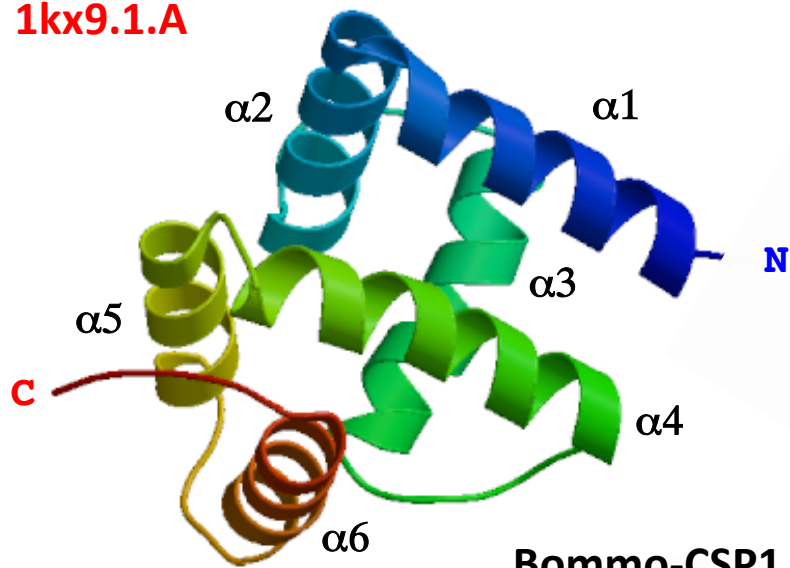

Bommo-CSP1

1kx9.1.A

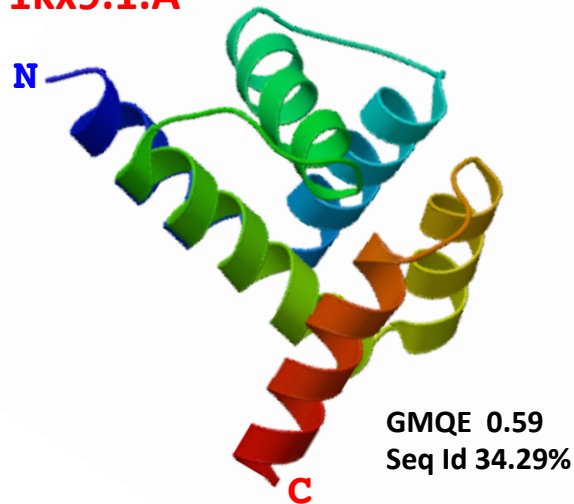

GMQE 0.59  
Seq Id 34.29%

Mp10

A7UL73.1.A

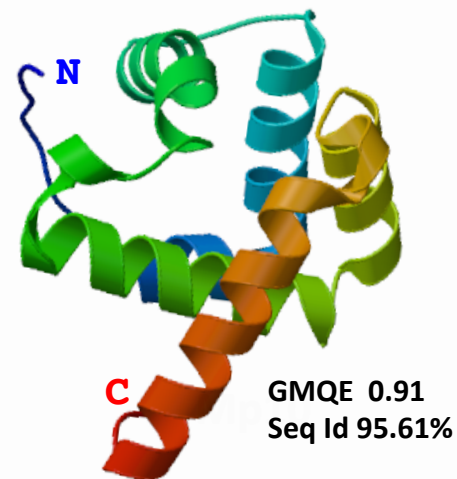

GMQE 0.91  
Seq Id 95.61%

1kx9.1.A

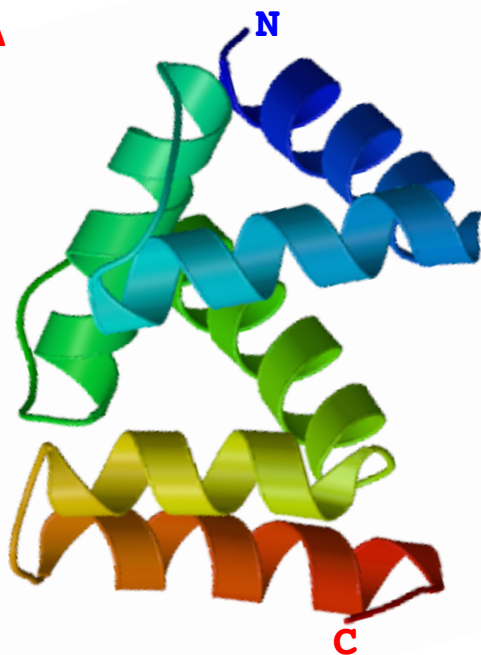

GMQE 0.34  
Seq Id 36.11%

Bommo-CSP10

Q3LB93.1.A

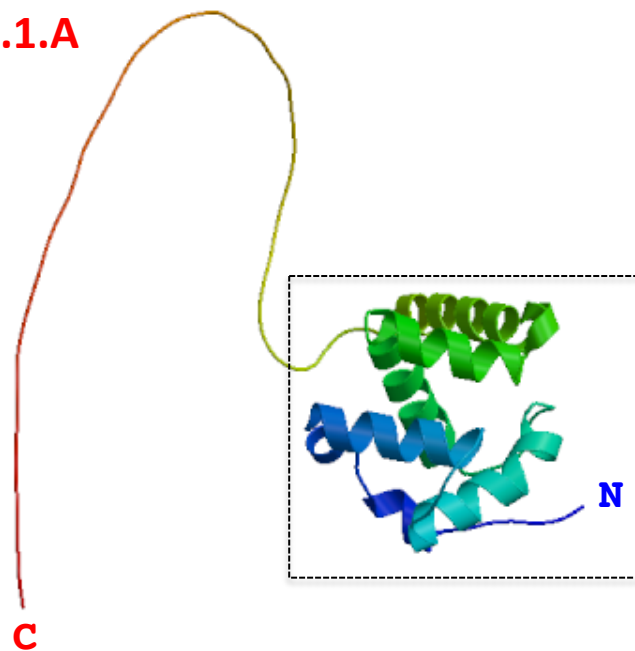

GMQE 0.68  
Seq Id 99.38%

**Q9W0X2.1.A**

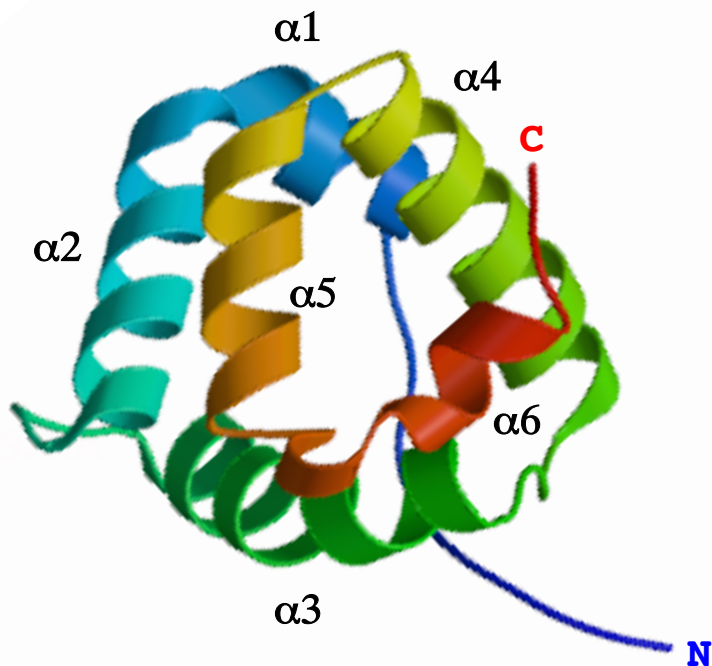

GMQE 0.93  
Seq Id 79.41%

**1kx9.1.A**

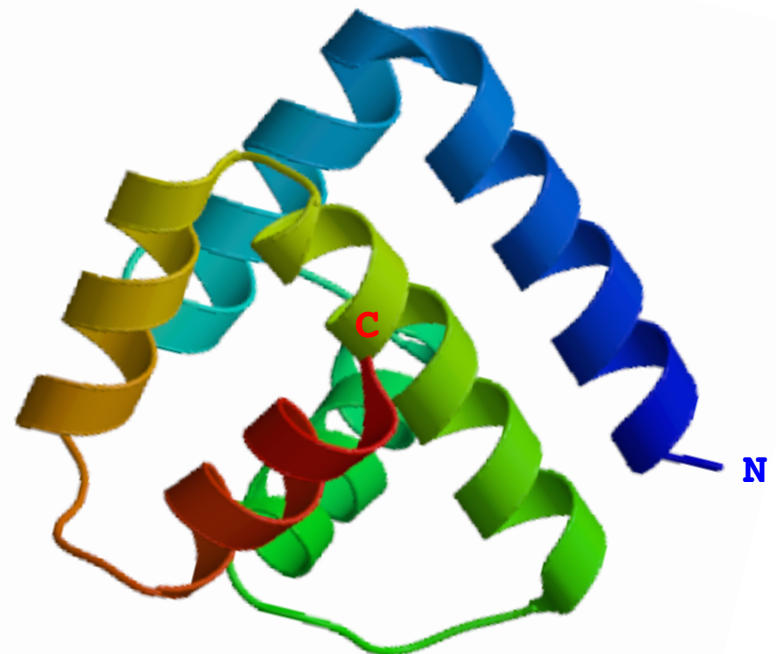

GMQE 0.66  
Seq Id 46.53%

**GH22042**  
*Drosophila grimshawi*  
pherokine (hemolymph protein)

1n8u.1.A

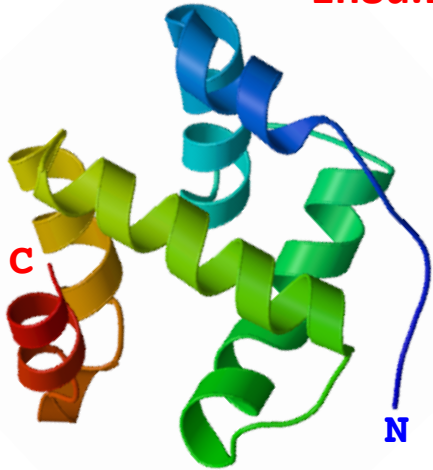

GMQE 0.15  
Seq Id 39.18%

A0A835CMW0.1.A

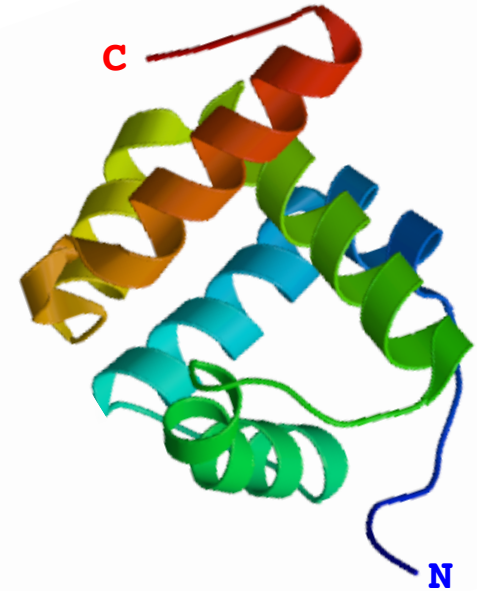

GMQE 0.89  
Seq Id 100.00%

1kx9.1.A

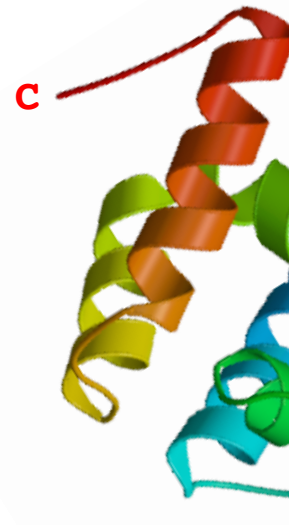

GMQE 0.65  
Seq Id 46.36%

1kx9.1.A

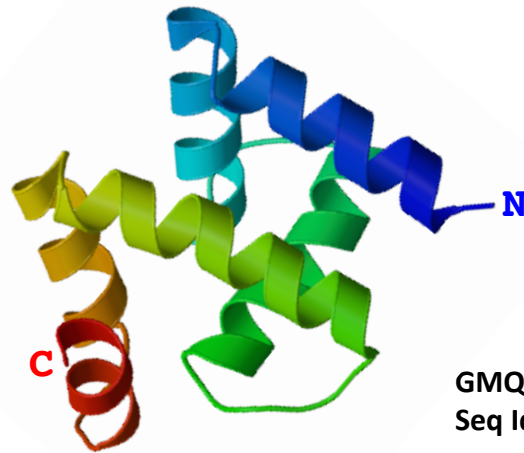

GMQE 0.15  
Seq Id 39.18%

XM\_044889794

*Coccinella septempunctata*

eukaryotic translation initiation factor 4 gamma-like

AHX71992 (KJ451426)

*Aphis gossypii*

acid trehalase

A0AGI8TVU3.1

1kx9.1.A

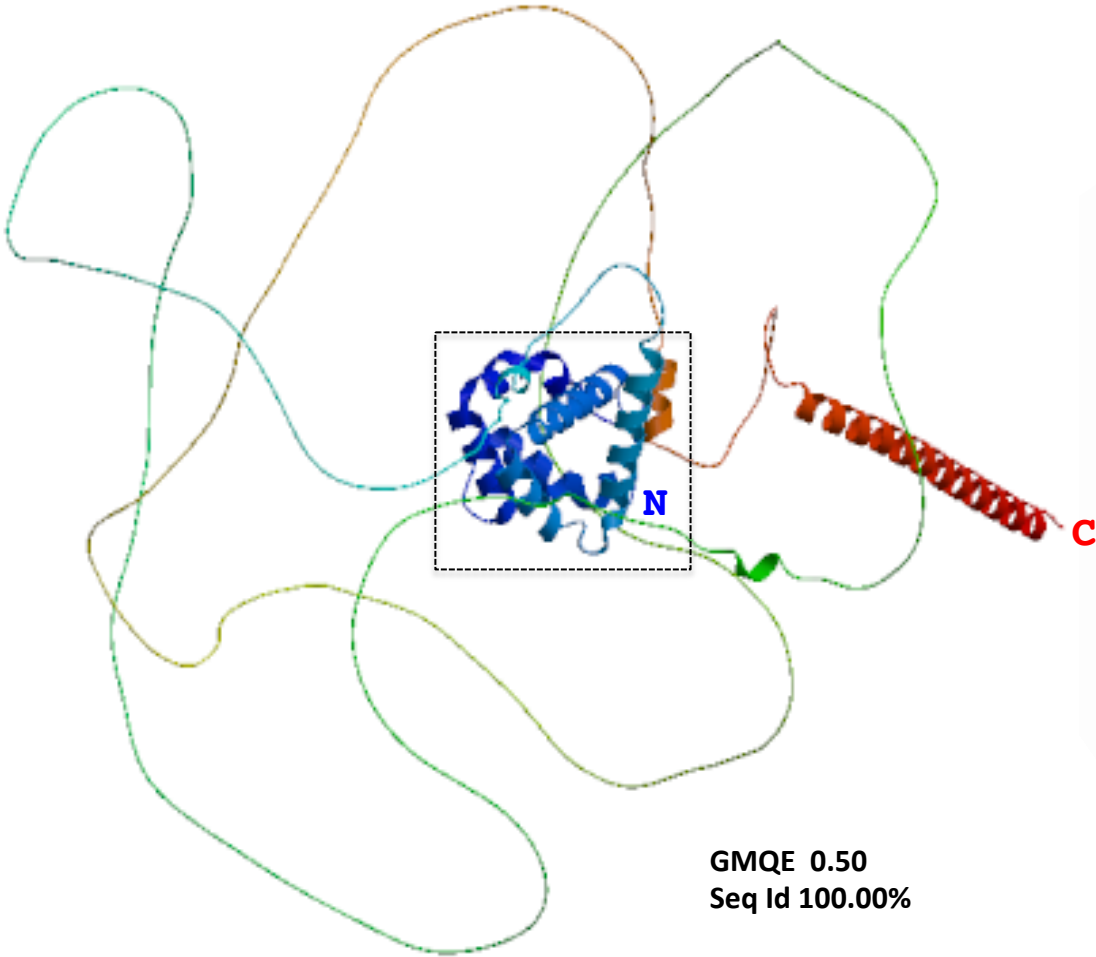

GMQE 0.50  
Seq Id 100.00%

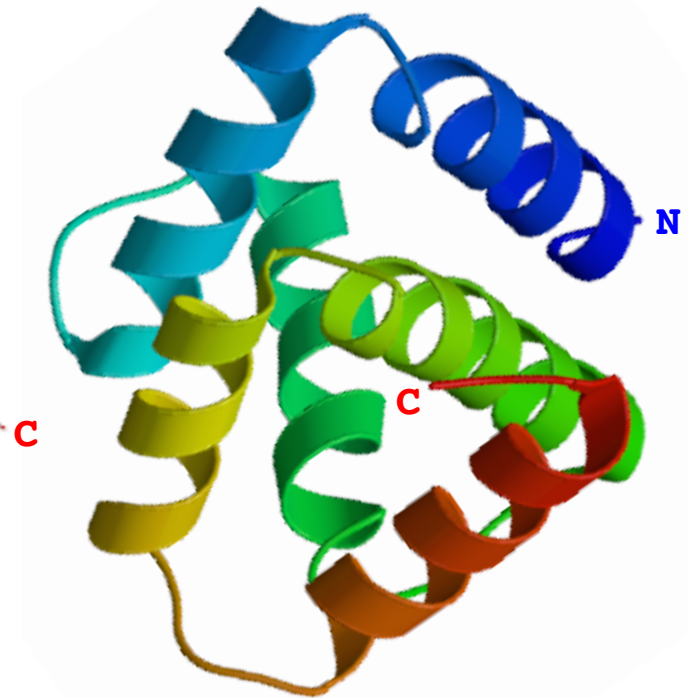

GMQE 0.12  
Seq Id 30.56%

XP\_021703245  
*Aedes aegypti*  
nuclear pore complex protein  
(NPCP)

A0A2H4ZB78.1.A

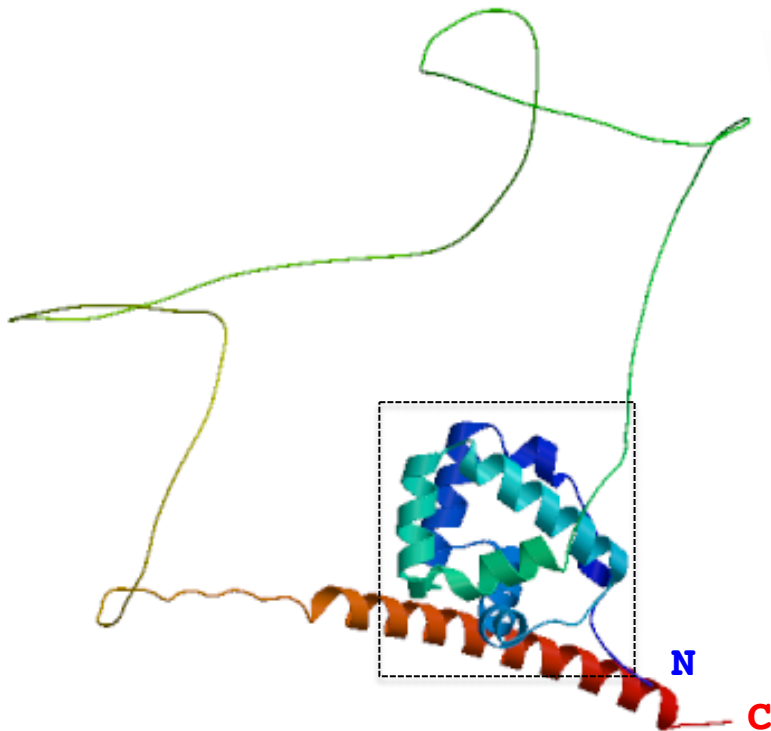

GMQE 0.62  
Seq Id 97.54%

1kx9.1.A

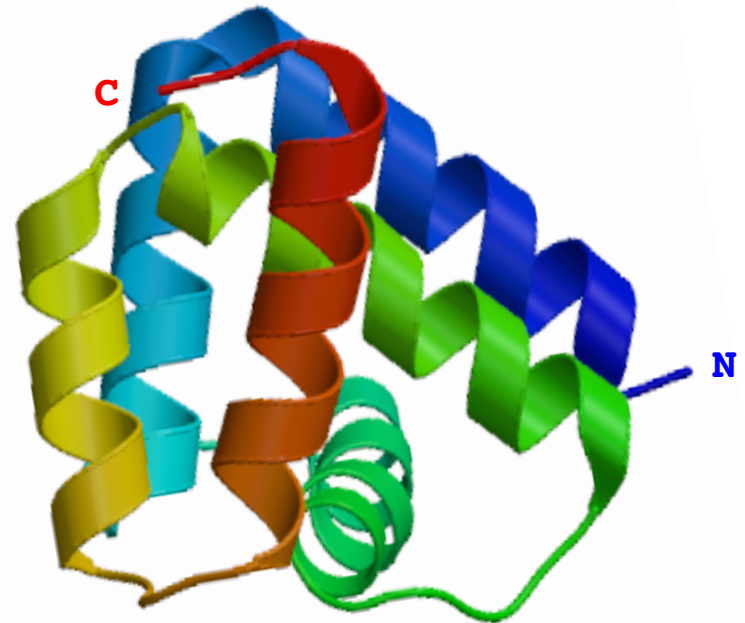

GMQE 0.23  
Seq Id 33.64%

XP\_018563025  
*Anoplophora glabripennis*  
cell wall integrity and stress response component 3-like  
(CWP)

**Q6H8Y7.1.A**

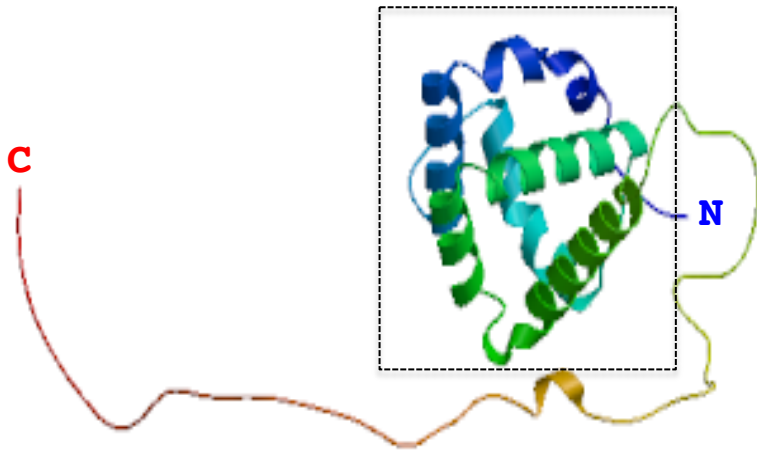

GMQE 0.37  
Seq Id 71.34%

**1kx9.1.A**

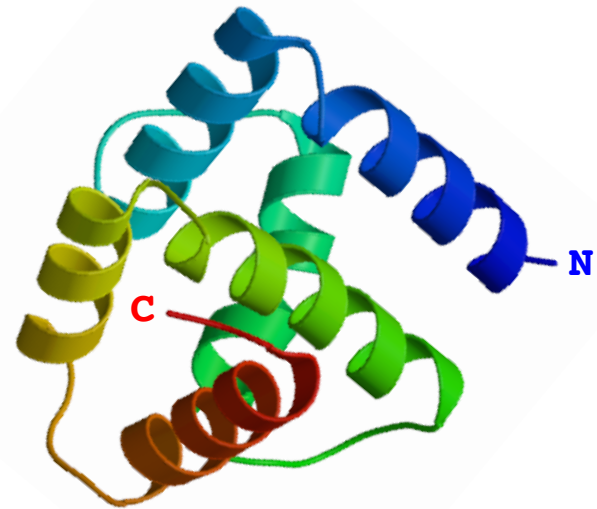

GMQE 0.20  
Seq Id 32.41%

**XM\_055738352**  
***Uranotaenia lowii***  
**integumentary mucin C.1-like**  
**Translation Initiation Factor (TIF)**

**A0A6I8TWU8.1.A**

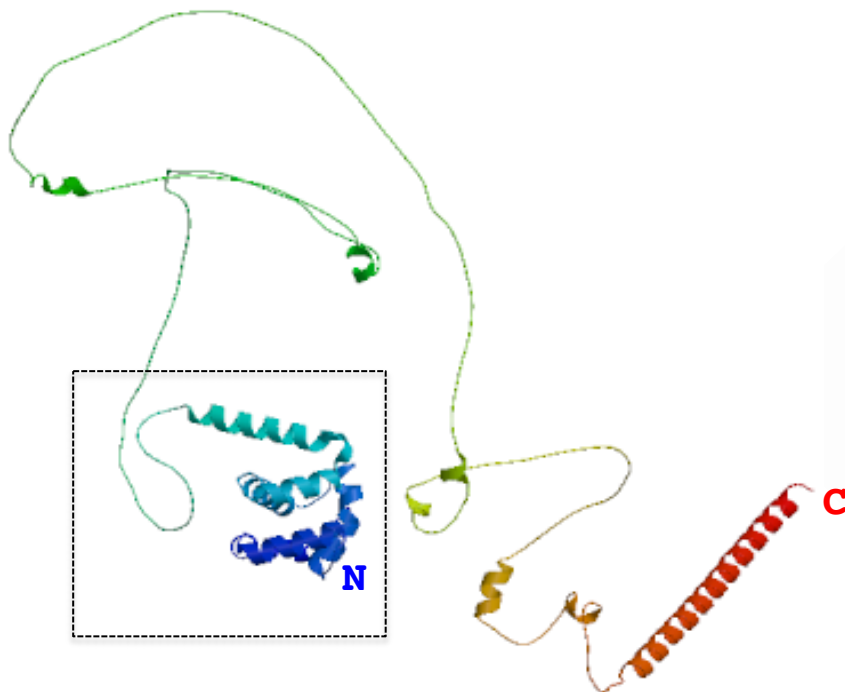

GMQE 0.55  
Seq Id 89.92%

**1kx9.1.A**

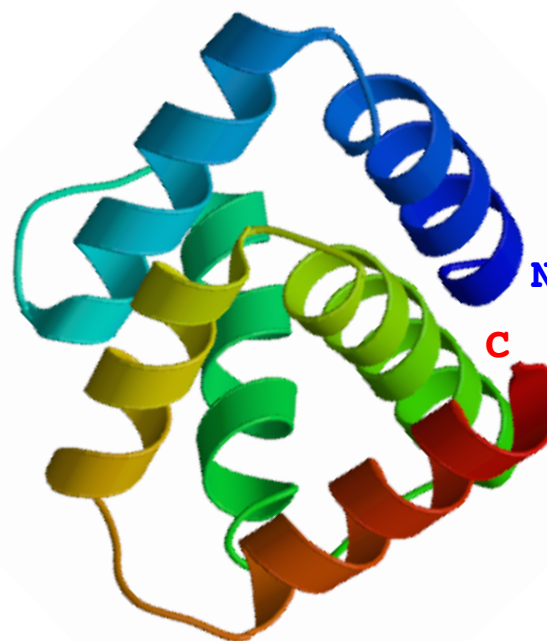

GMQE 0.17  
Seq Id 32.08%

**XM\_029870982**  
***Aedes albopictus***  
**nuclear pore complex protein**  
**(NPCP)**



**A0A6H0D4B0.1.A**

**1kx9.1.A**

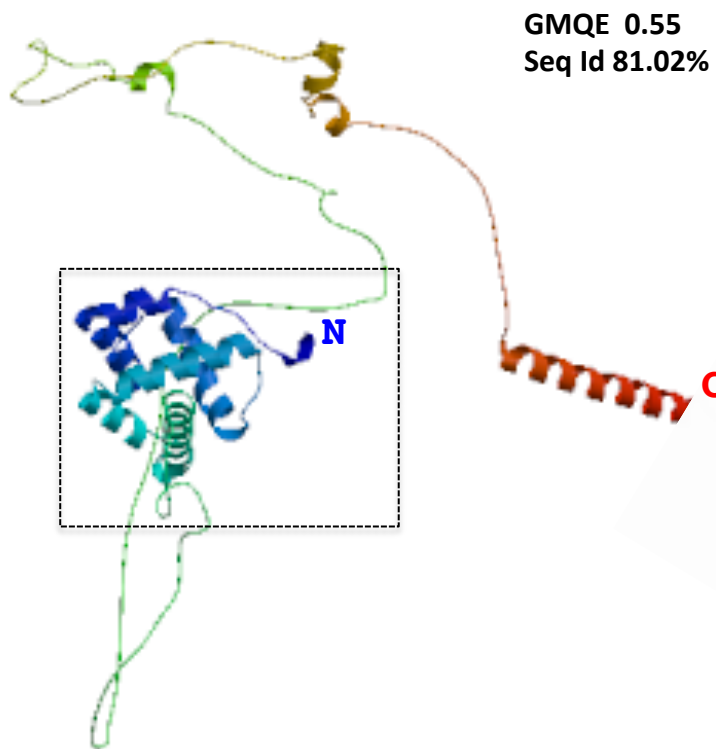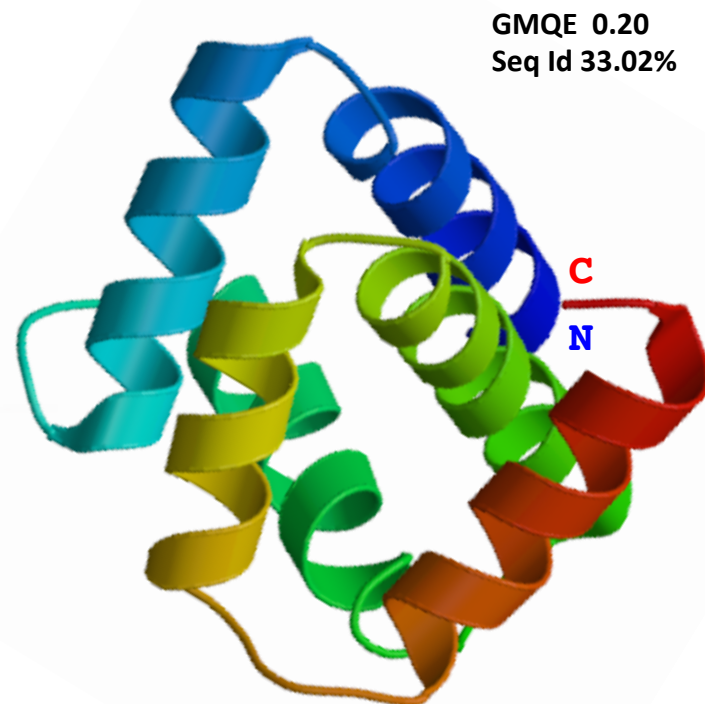

**XM\_056065396**  
***Eupeodes corollae***  
**rho GTPase-activating protein 17-like**  
**(Rho)**



A0A182NU82.1.A

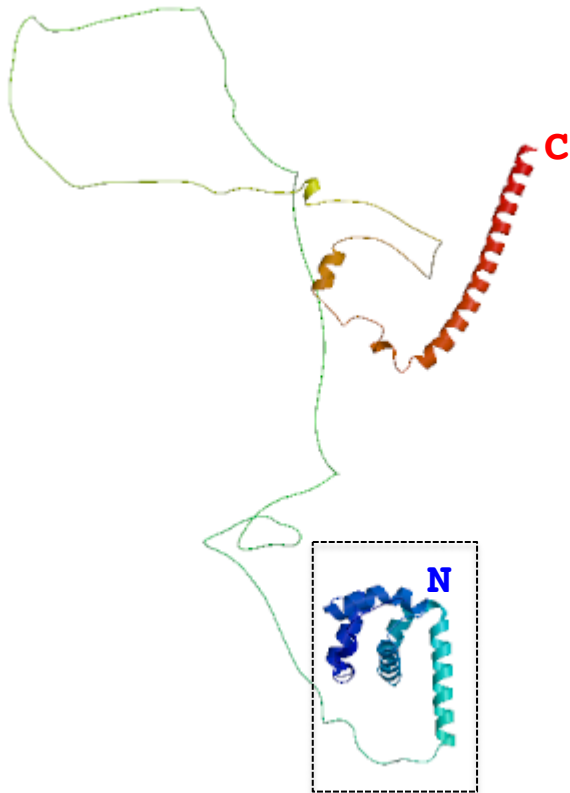

GMQE 0.53  
Seq Id 84.12%

1kx9.1.A

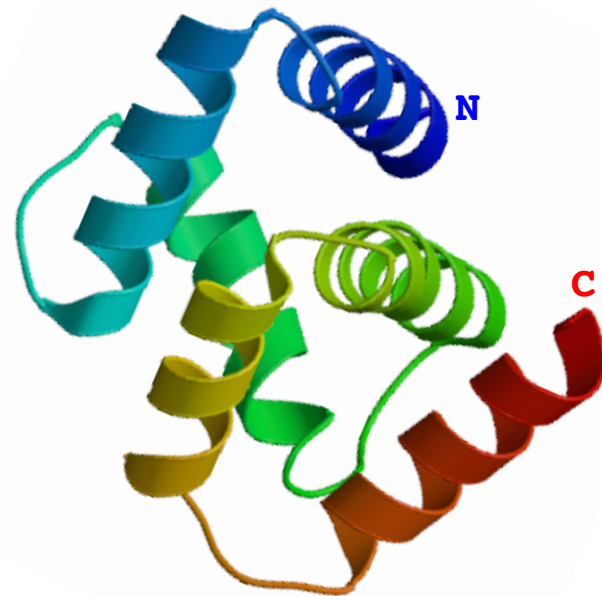

GMQE 0.18  
Seq Id 32.38%

**XM\_050245628**  
***Anopheles aquasalis***  
**WAS/WASL-interacting protein family**  
**member 1-like isoform X2**  
**(Mucin)**

A0A0K8TVC4.1.A

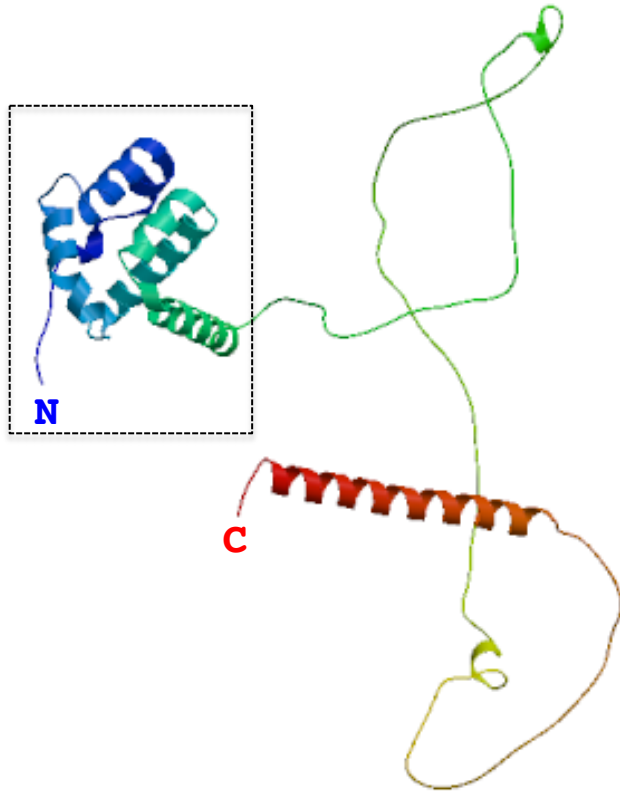

GMQE 0.64  
Seq Id 72.48%

1kx9.1.A

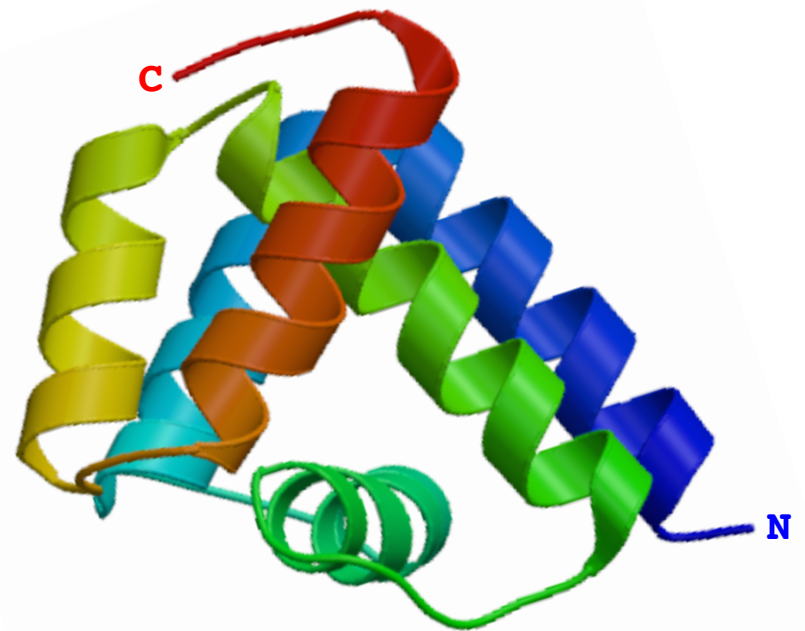

GMQE 0.25  
Seq Id 34.26%

XM\_047175293

*Helicoverpa zea*

actin cytoskeleton-regulatory complex protein PAN1-like  
(ASRP)

A0A182NU82.1.A

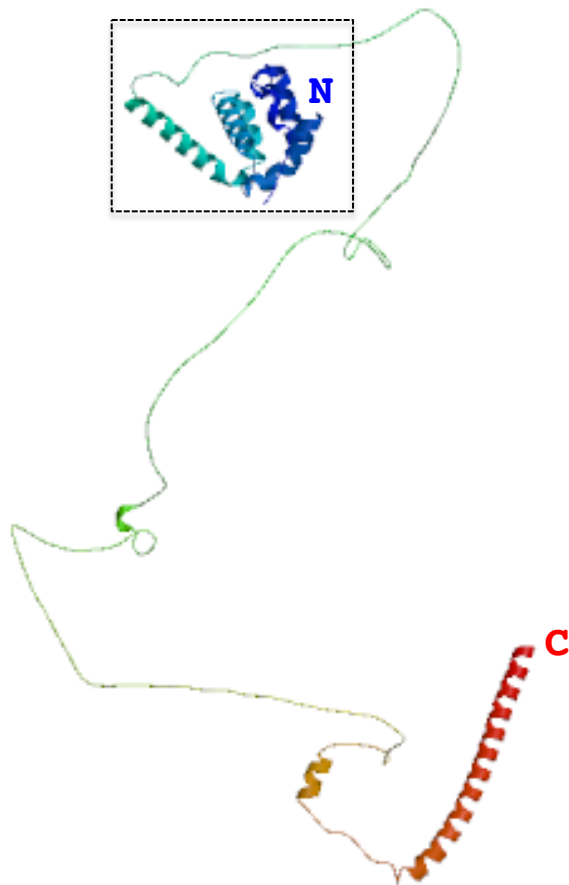

GMQE 0.57  
Seq Id 88.40%

1kx9.1.A

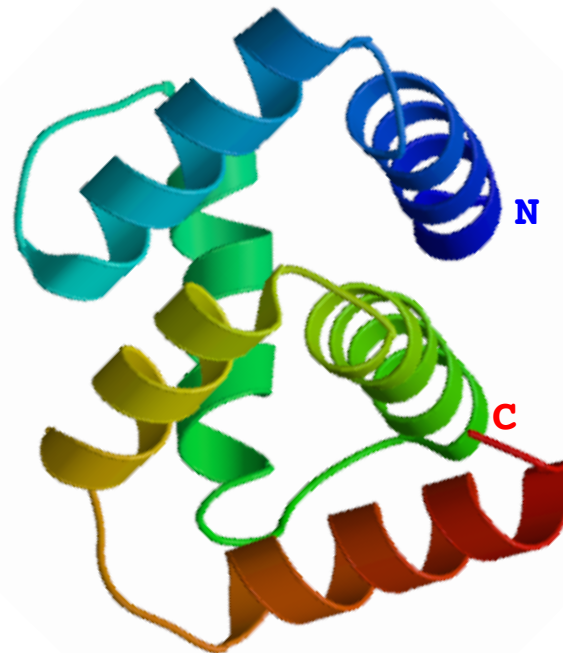

GMQE 0.18  
Seq Id 32.08%

**XM\_058204117**  
***Anopheles bellator***  
**mucin-2-like**  
**Protein UL36**

**A0A182NU82.1.A**

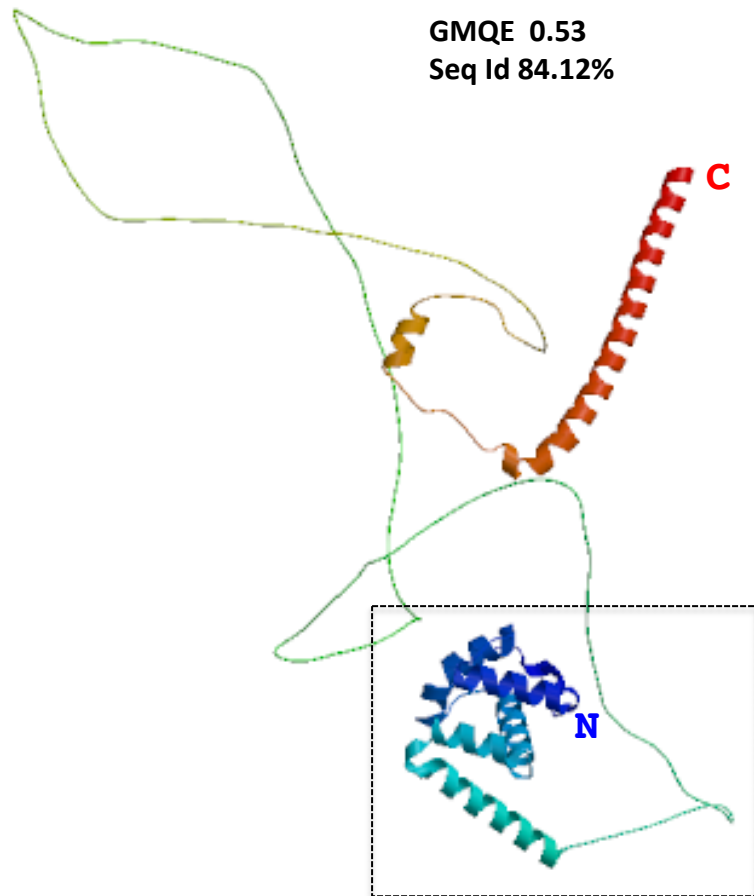

**1kx9.1.A**

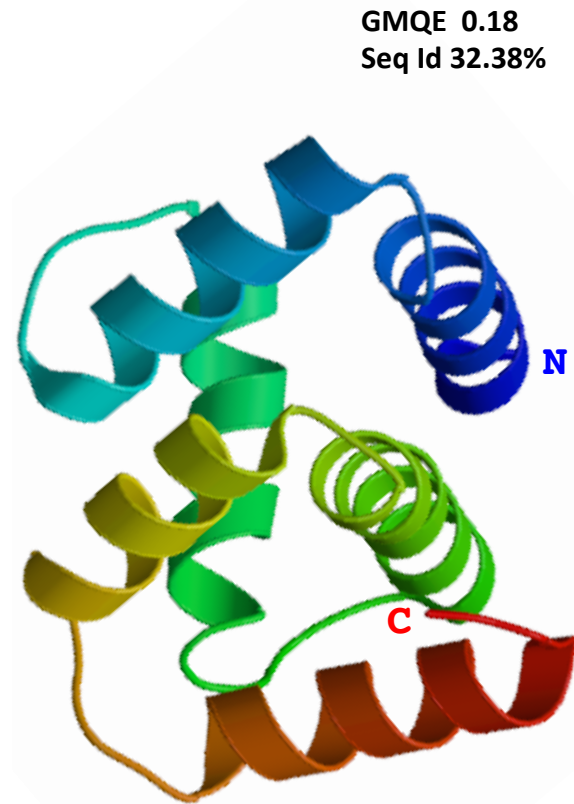

**XM\_053009541**  
***Anopheles cruzii***  
**WAS/WASL protein**  
**Actin skeleton-regulatory complex (ASRC)**

A0A1Q3FP99.1.A

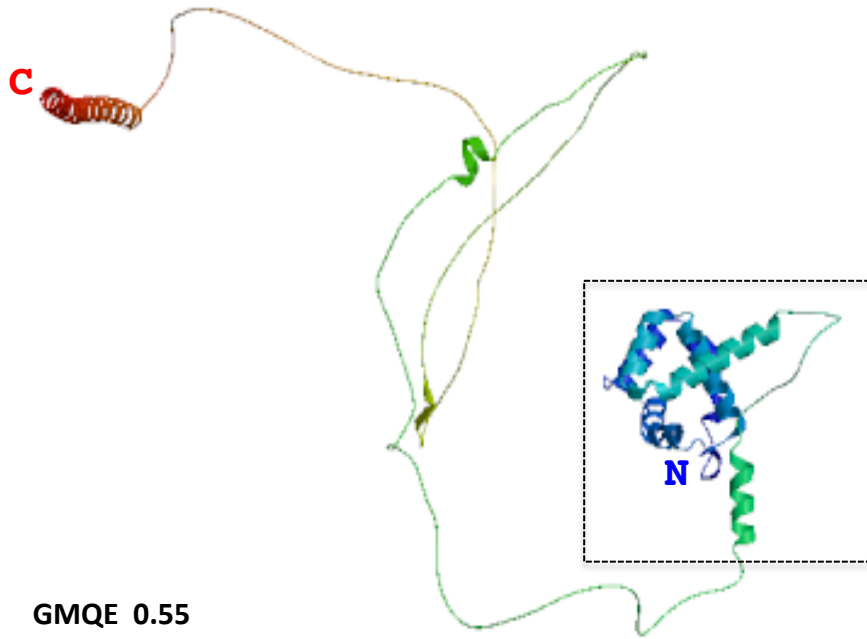

GMQE 0.55  
Seq Id 93.30%

1kx9.1.A

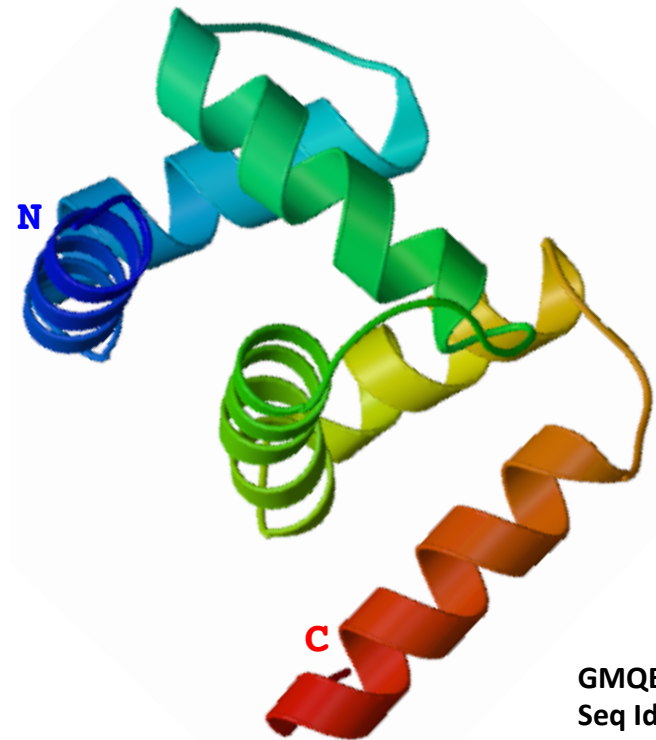

GMQE 0.17  
Seq Id 29.91%

XM\_038253956  
*Culex quinquefasciatus*  
cell wall protein DAN4  
(CWP)

A0A1Q3FQF4.1.A

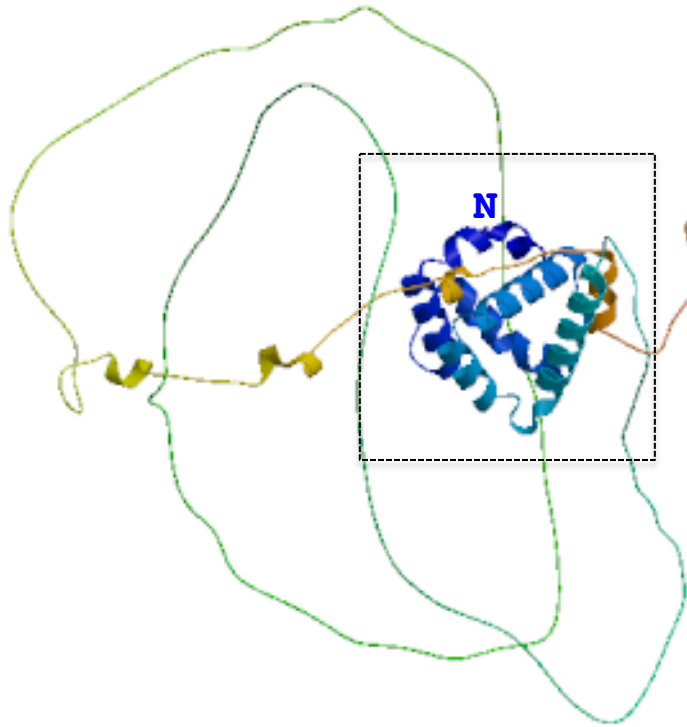

GMQE 0.52  
Seq Id 90.45%

1kx9.1.A

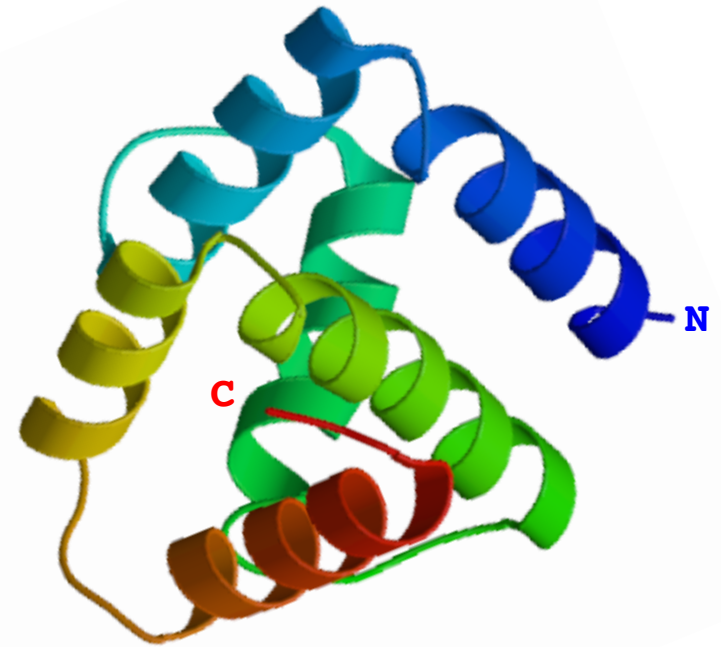

GMQE 0.15  
Seq Id 31.43%

XM\_052707633  
*Culex pipiens pallens*  
mucin-2-like  
(Mucin)

A0A1V1WC08.1.A

1kx9.1.A

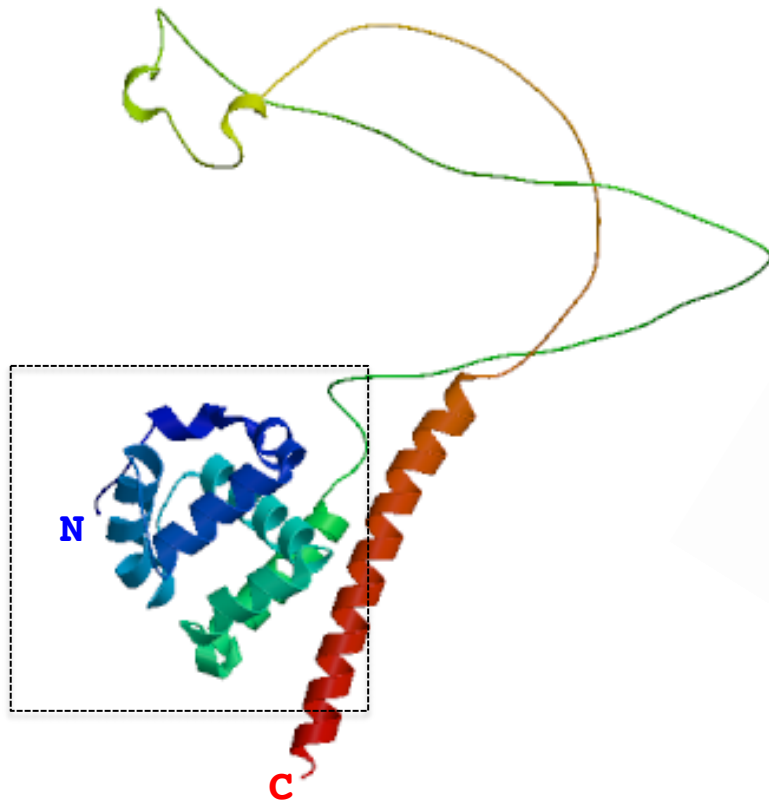

GMQE 0.64  
Seq Id 70.31%

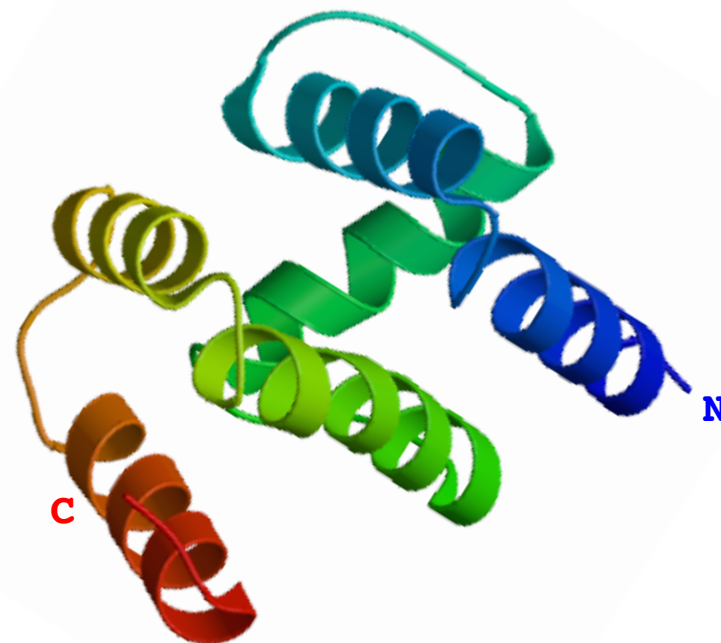

GMQE 0.25  
Seq Id 34.58%

CAH2235359  
*Pararge aegeria aegeria*  
Herpes virus major outer envelope glycoprotein  
(jg5928)



**A0A2H4ZB78.1.A**

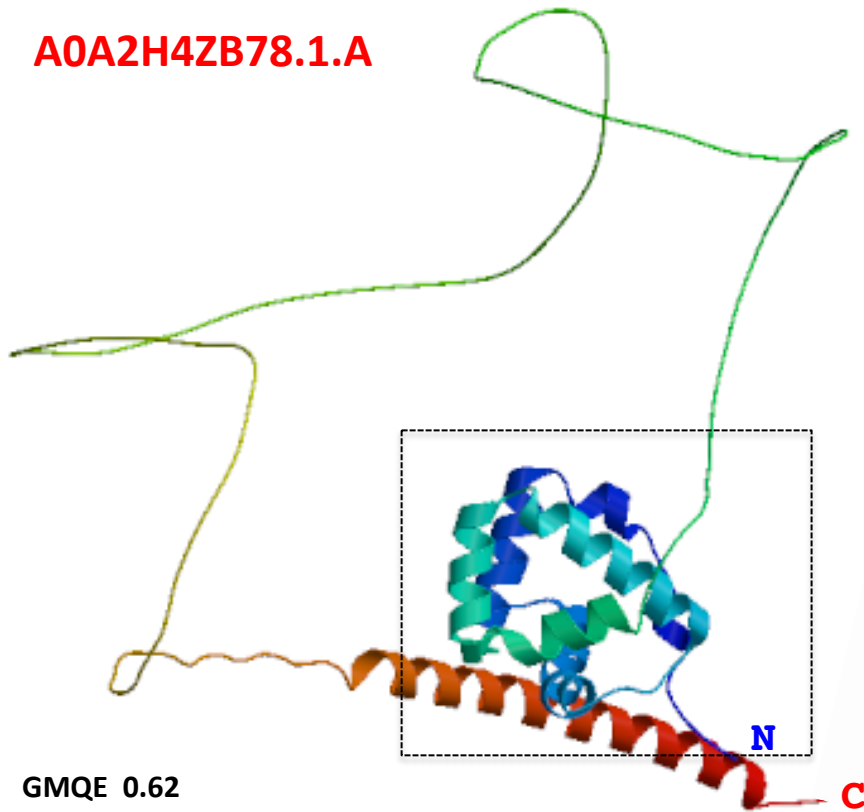

GMQE 0.62  
Seq Id 97.54%

**1kx9.1.A**

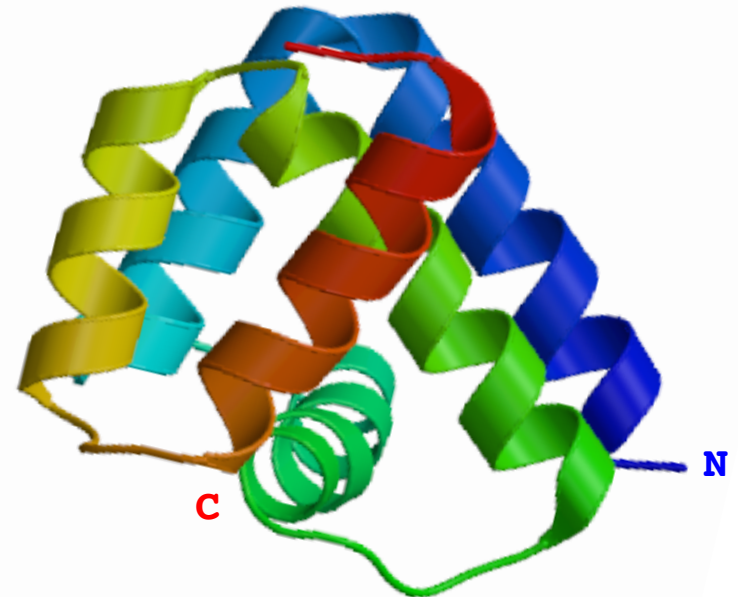

GMQE 0.23  
Seq Id 33.64%

**XM\_018707509**  
***Anoplophora glabripennis***  
**cell wall integrity and stress response component 3-like**  
**(CWP)**

A0A345BEP2.1.A

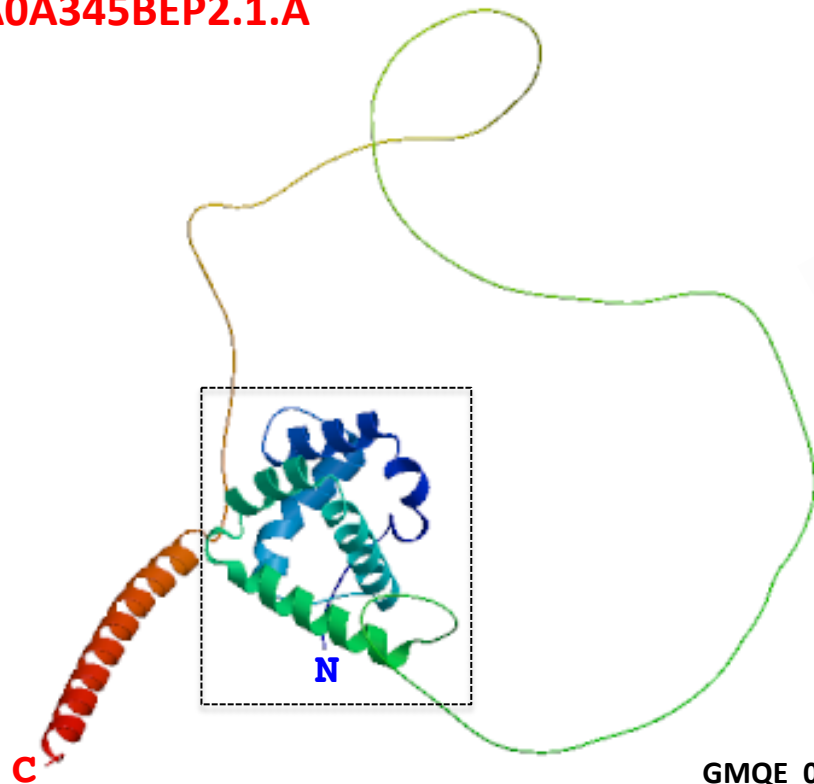

GMQE 0.64  
Seq Id 70.08%

1kx9.1.A

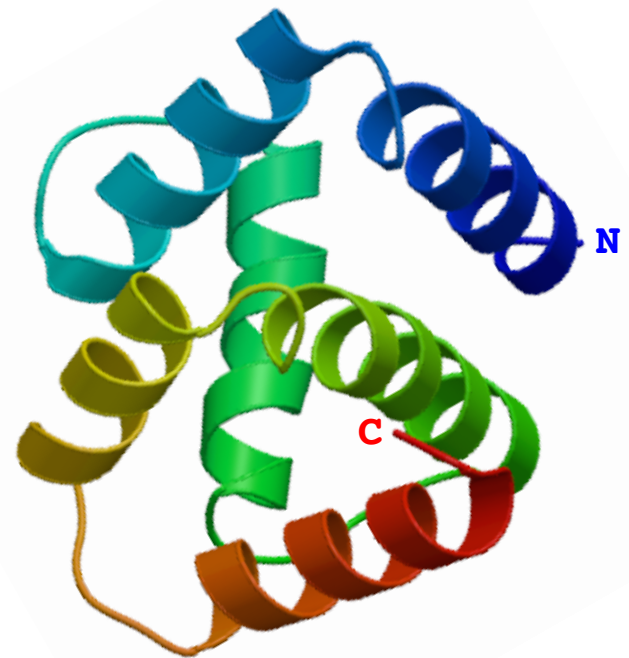

GMQE 0.24  
Seq Id 39.25%

**XM\_048140790**  
***Leguminivora glycinivorella***  
**Complex-activating protein rickA-like isoform X2**  
**mucin-2-like**

A0A1Q3FQF4.1.A

1kx9.1.A

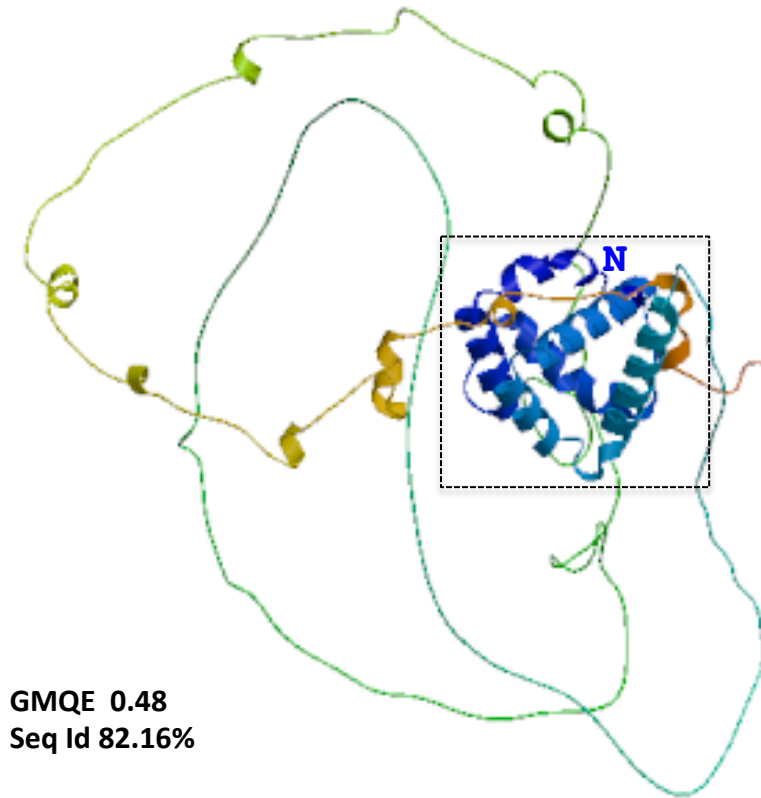

GMQE 0.48  
Seq Id 82.16%

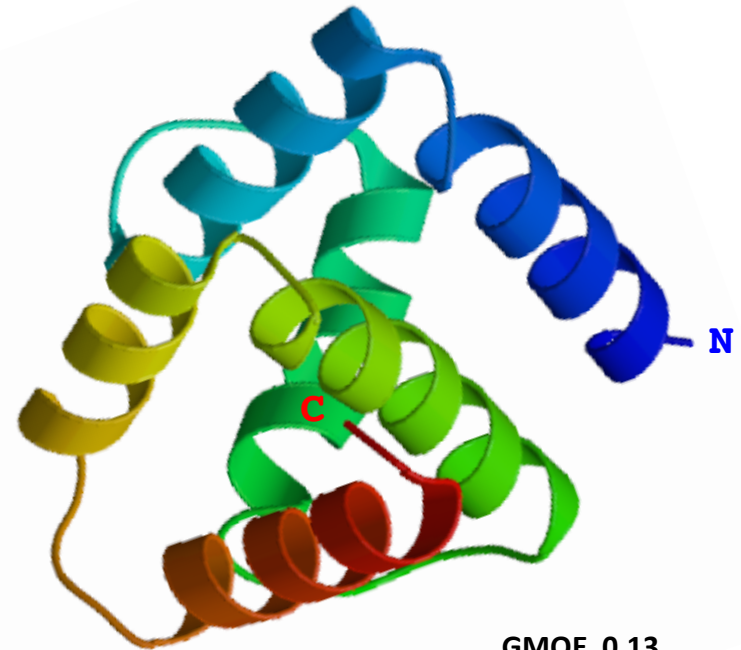

GMQE 0.13  
Seq Id 30.19%

XM\_038253951  
*Culex quinquefasciatus*  
cell wall protein DAN4  
(CWP)

D6WUE8.1.A

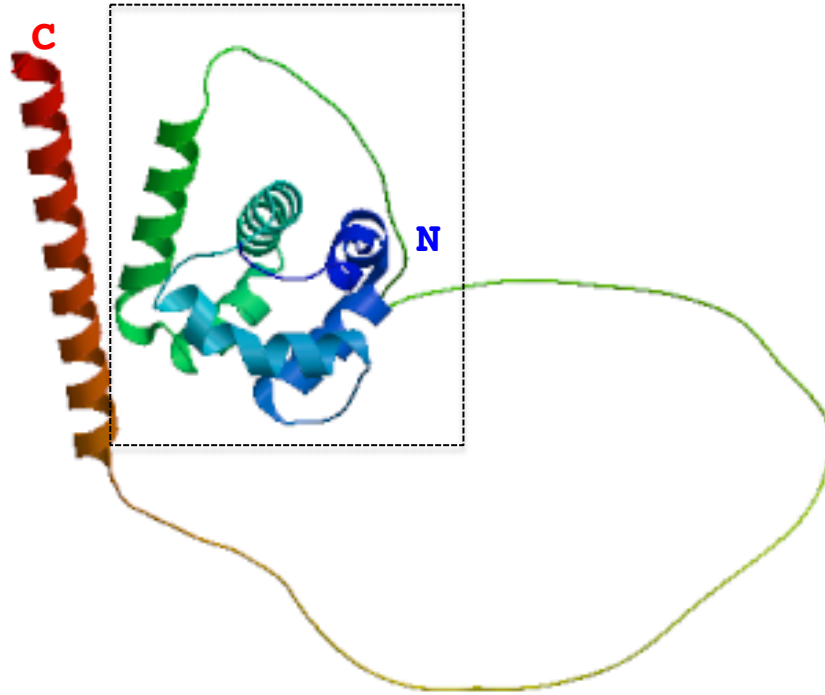

GMQE 0.29  
Seq Id 33.64%

1kx9.1.A

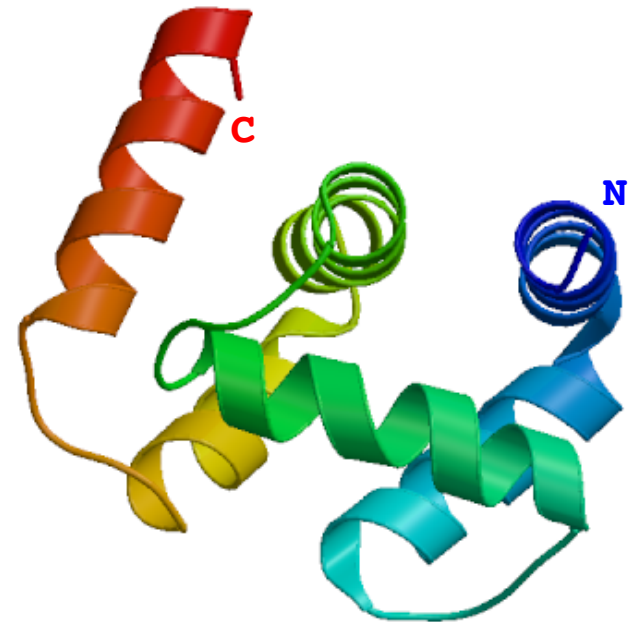

GMQE 0.70  
Seq Id 88.79%

**XM\_044408485**  
***Tribolium madens***  
**Allergen Tha p 1-like**  
**(IgE-binding protein)**

**A0A345BEP2.1.A**

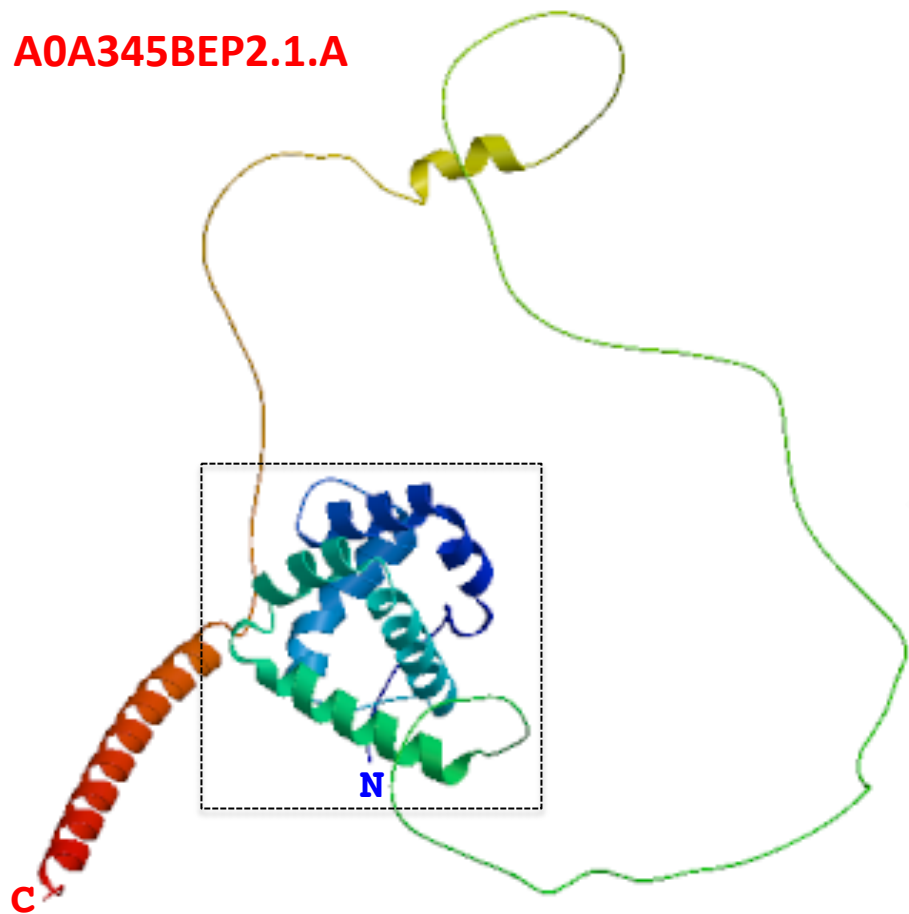

GMQE 0.63  
Seq Id 75.67%

**1kx9.1.A**

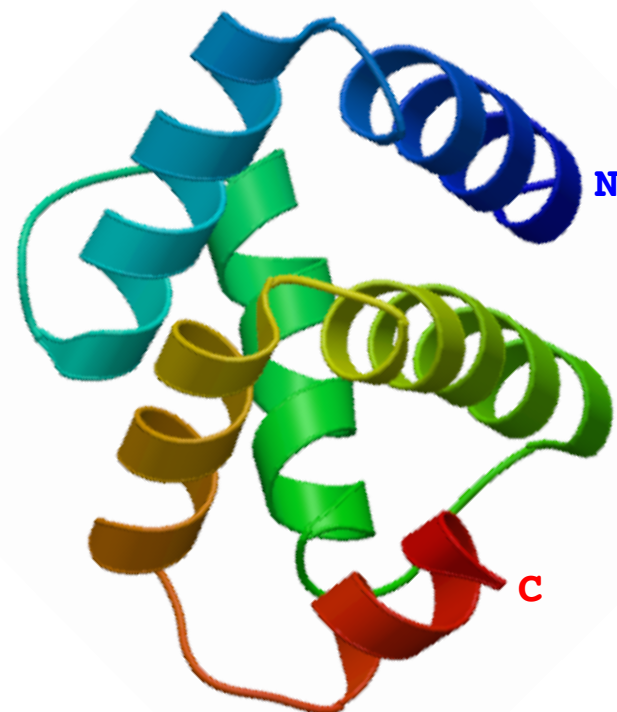

GMQE 0.22  
Seq Id 38.78%

**XM\_053758324**  
***Plodia interpunctella***  
**Actin microtubule association protein**  
**(Formin-1-like)**

**A0A1V1WC08.1.A**

**1kx9.1.A**

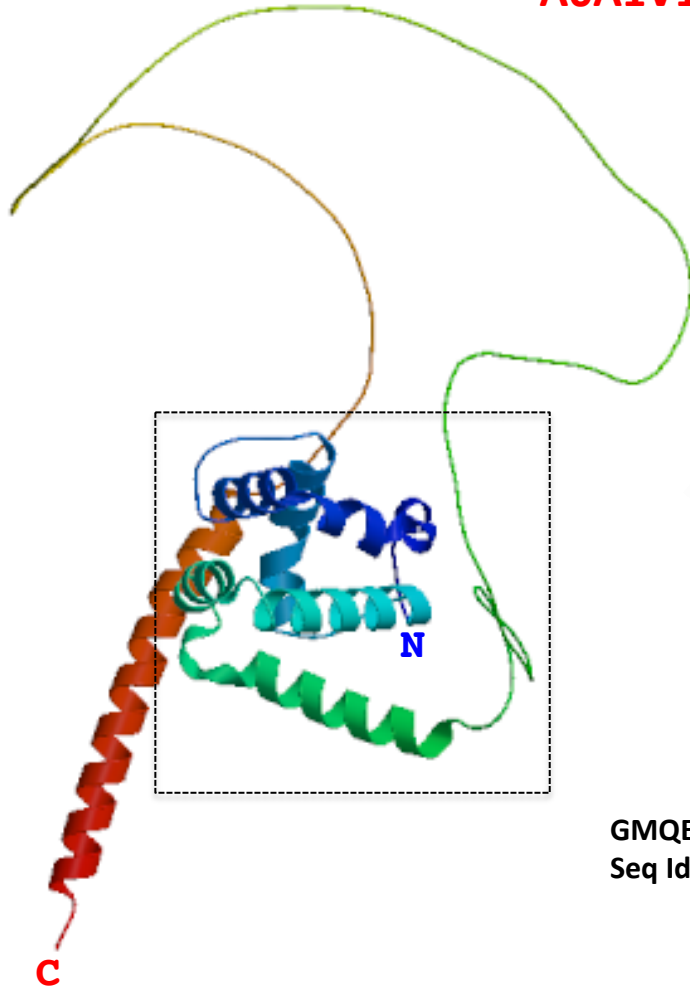

GMQE 0.65  
Seq Id 87.07%

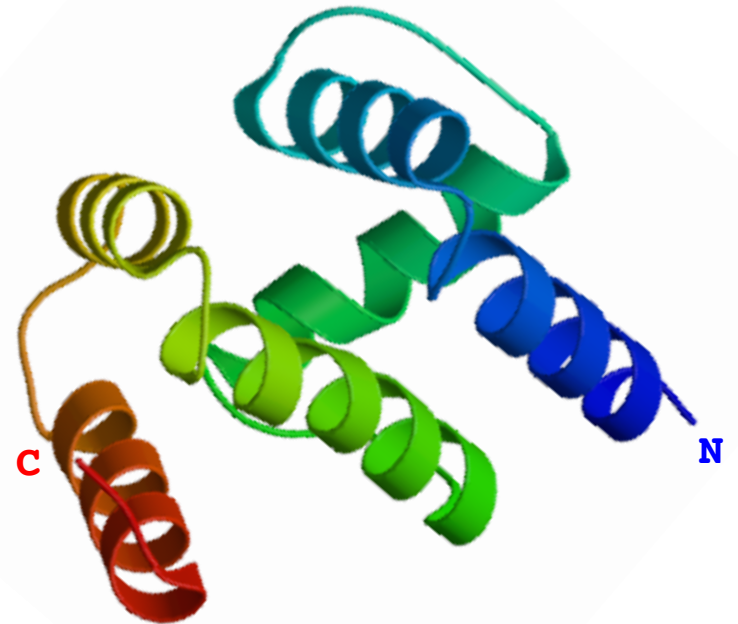

GMQE 0.26  
Seq Id 35.51%

**XM\_022960083**  
***Spodoptera litura***  
**actin cytoskeleton-regulatory complex protein pan1-like**  
**(AS RP)**

AOA6I8TWU8.1.A

1kx9.1.A

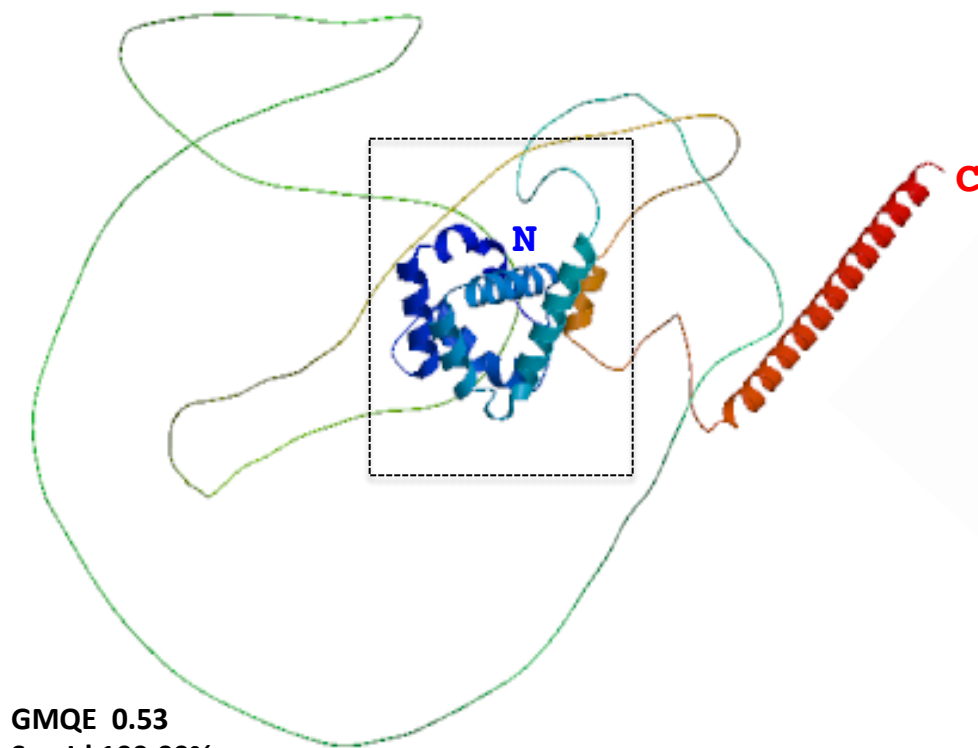

GMQE 0.53  
Seq Id 100.00%

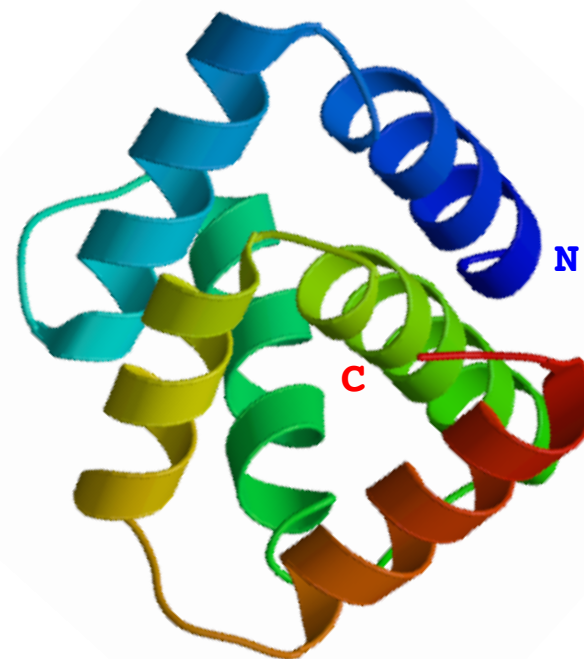

GMQE 0.14  
Seq Id 30.56%

XM\_021847563  
*Aedes aegypti*  
nuclear pore complex protein  
(NPCP)



A0A8I8TWU8.1.A

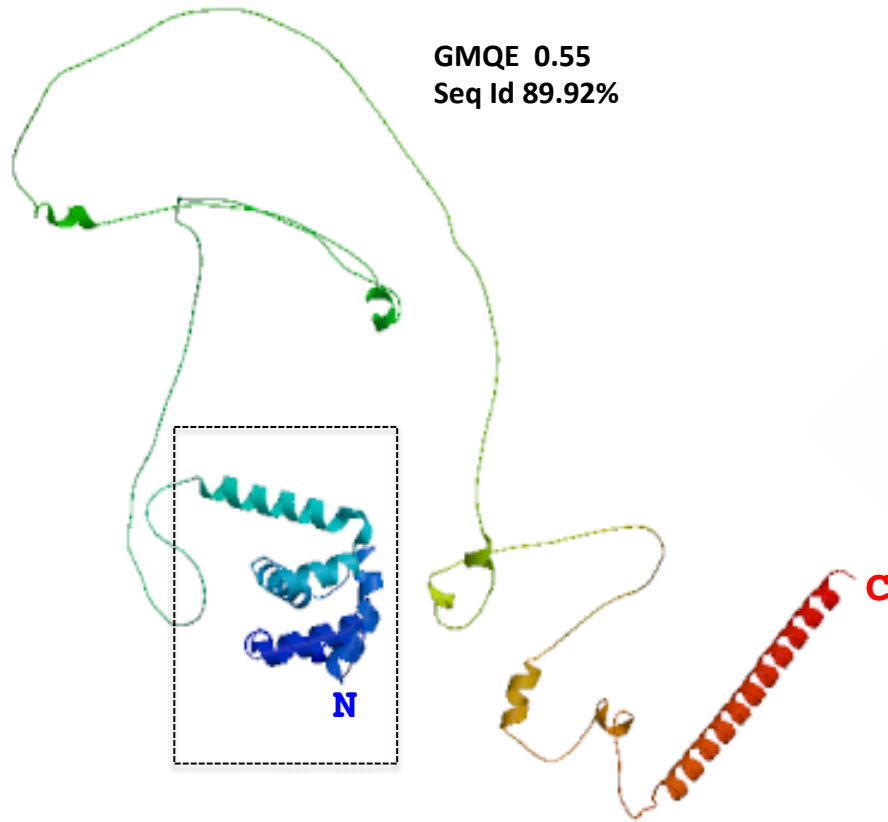

1kx9.1.A

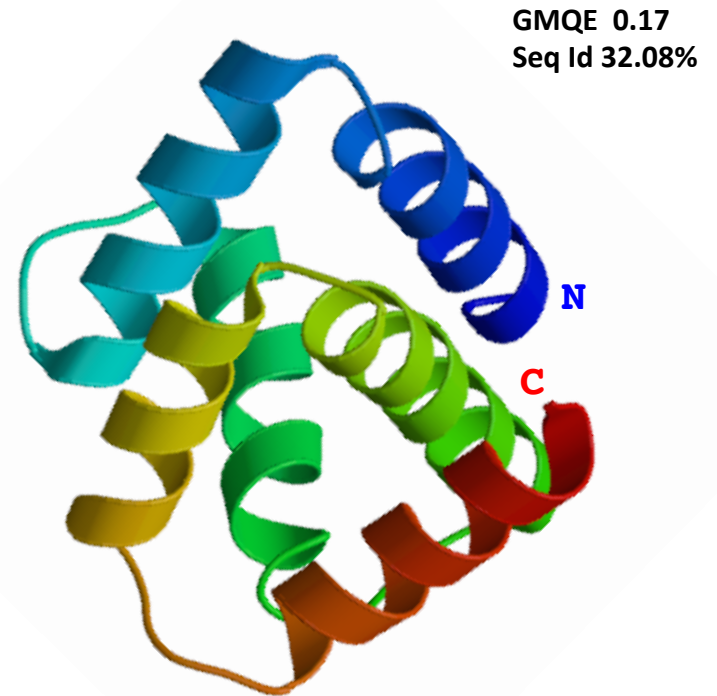

**XM\_029870982**  
***Aedes albopictus***  
**SamkC nuclear pore complex protein**  
**(NPCP)**

AOA182NU82.1.A

1kx9.1.A

GMQE 0.53  
Seq Id 79.39%

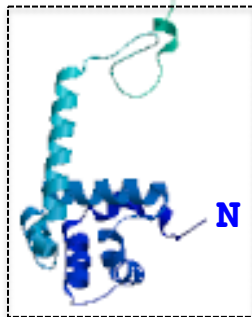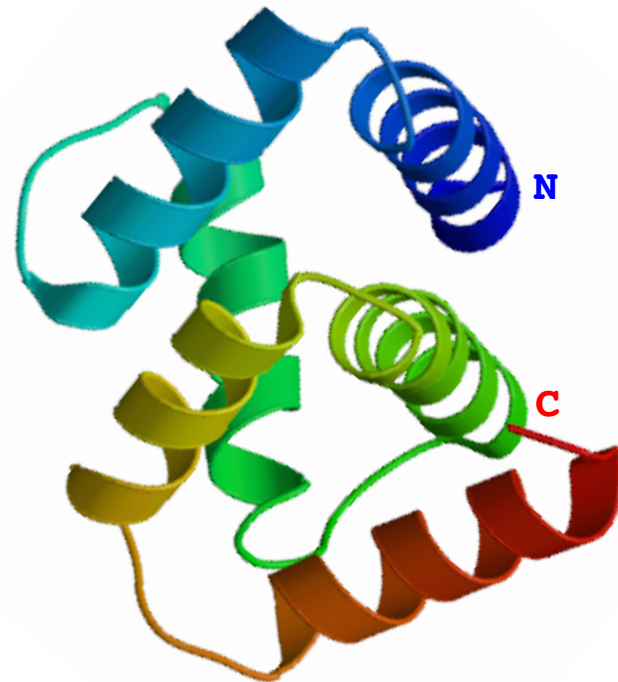

GMQE 0.14  
Seq Id 32.71%

XM\_035922754  
*Anopheles albimanus*  
extensin-like Leucine-Rich repeat  
(LRR)

A0A345BEP2.1.A

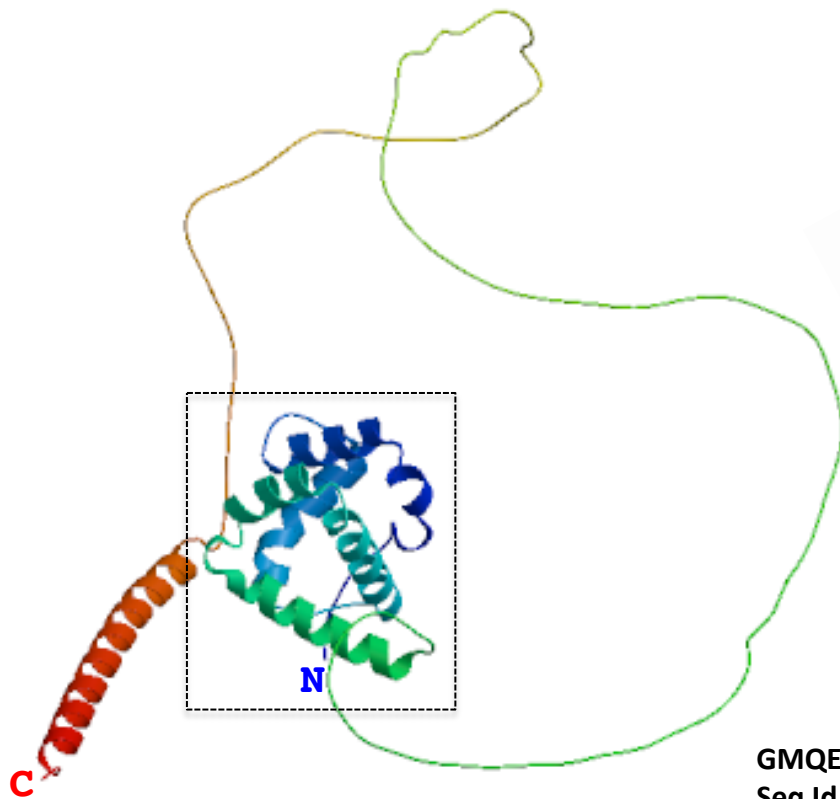

GMQE 0.64  
Seq Id 70.8%

1kx9.1.A

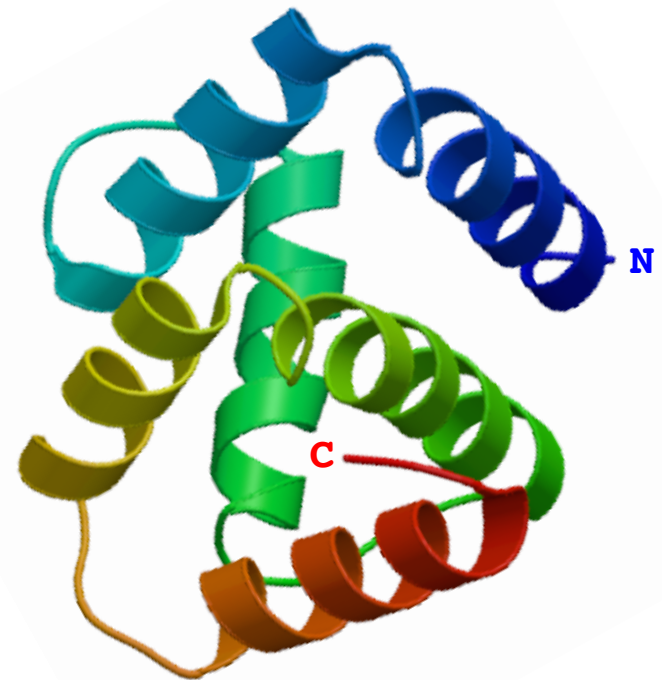

GMQE 0.24  
Seq Id 39.25%

XM\_050021059

*Pectinophora gossypiella*

YLP motif-containing protein 1-like

Nuclear nucleoside kinase (NNK)
