# Supplementary figures and images for: Renaming ‘Chemosensory’ Proteins (CSPs): ‘Lipoid-Binding Proteins’ — Molecular Nomenclature, Structure, Expression, Evolution, and Intracellular Functions
Source: Preprints.org preprint supplement (doi:10.20944/preprints202403.0173.v1), 2024-03-04

**A.**

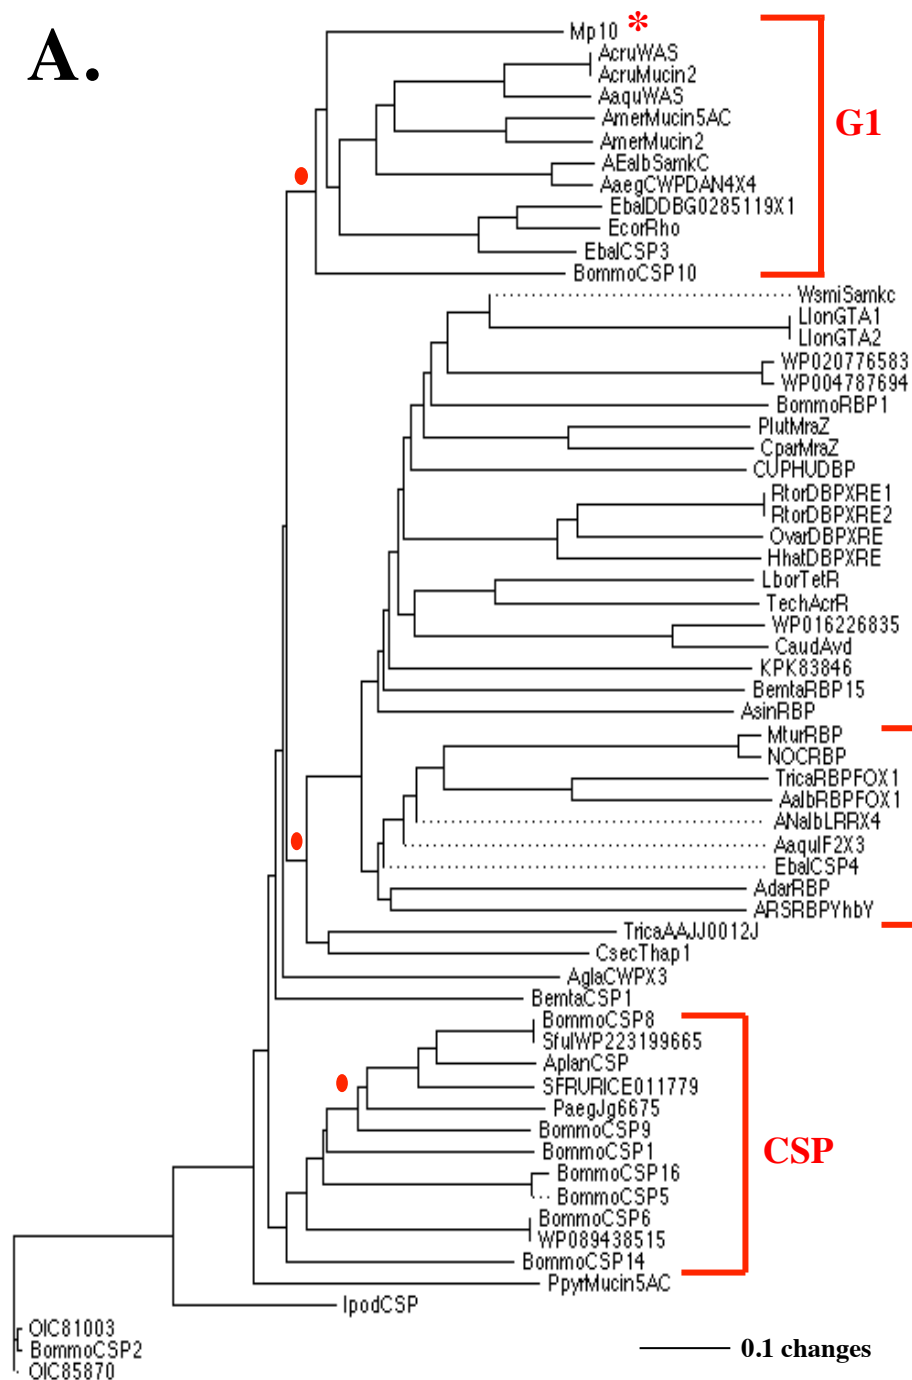

**B.**

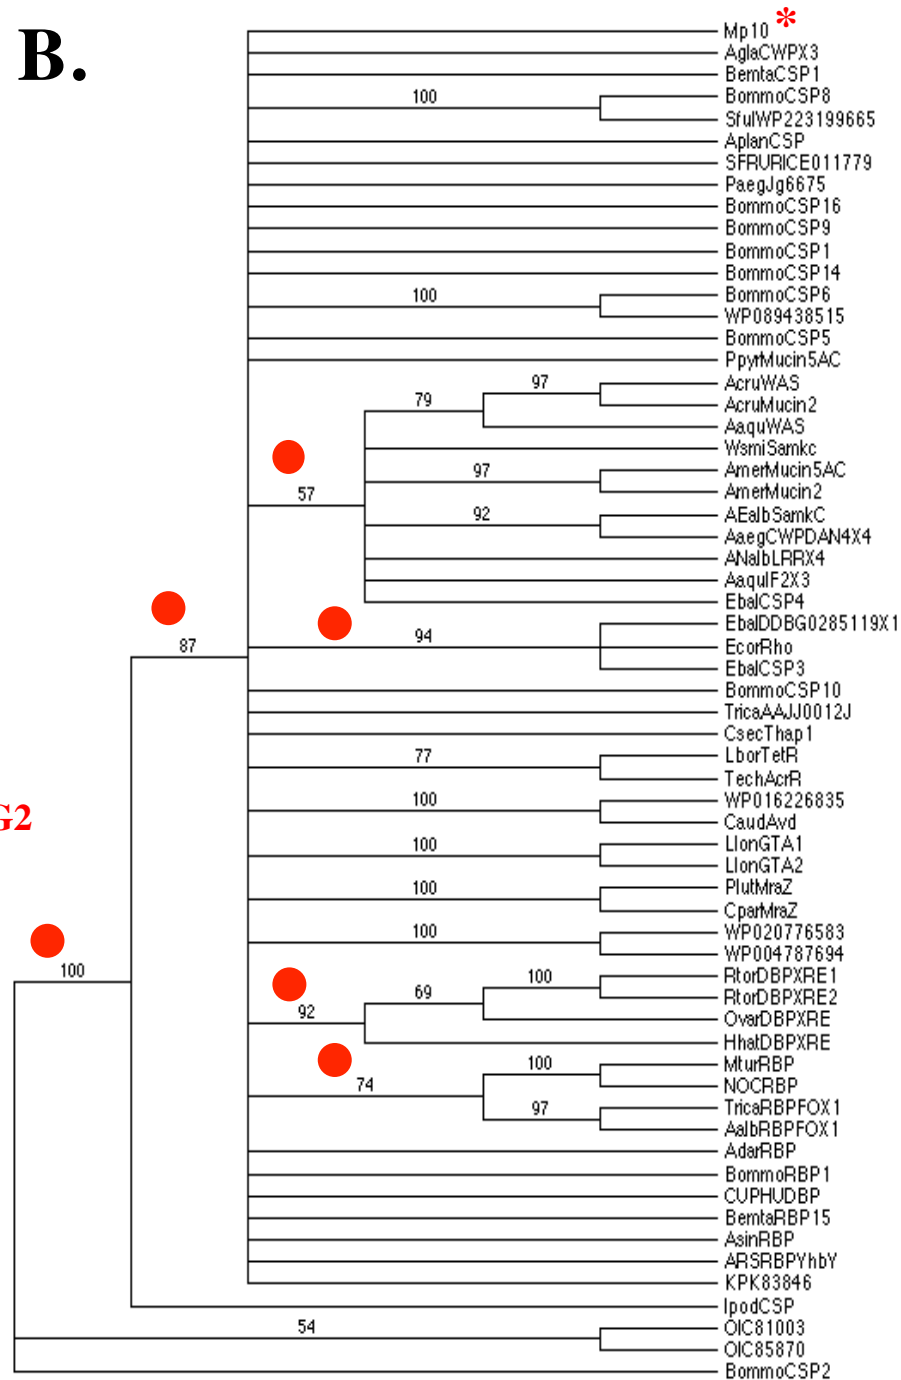

Supplement: Supplementary file 1 [file supplementary]
